# Supplementary material
Source: PubMed Central journal article supplement (PMC9839547)
Supplement: NIHMS1849205-supplement-Supplemental_Publication_Material.pdf [file NIHMS1849205-supplement-Supplemental_Publication_Material.pdf]

## SUPPLEMENTAL MATERIAL

**Paluch AE et al., Prospective Association of Daily Steps with Cardiovascular Disease: A Harmonized Meta-Analysis**

## Table of Contents

### Section 1. Study Level Characteristics [Click to View](#)

Table S1a. Study Level Descriptions of Data Collection and Processing

Table S1b. Study Level Description of Covariates in Final Model

Table S1c. Study Level Descriptive Characteristics of Participants

### Section 2. Risk of Bias Assessment [Click to View](#) (page 8)

Table S2. Study Quality Assessment

New Castle Ottawa Quality Assessment Scale description

### Section 3. Overall Sample Supplement Results [Click to View](#) (page 10)

Figure S1a. Overall Sample Quartile Comparisons, Forest Plots

Figure S1b. Overall Sample Quartile Comparisons, Funnel Plots

### Section 4. Age-Stratified Supplement Results [Click to View](#) (page 12)

Figure S2a. Age Subgroup Quartile Comparisons, Forest Plots

Figure S2b. Median Steps/d for Quartiles by Age Group Among Studies Included in Spline Analysis

### Section 5. Sex Stratified Supplement Results [Click to View](#) (page 16)

Figure S3a. Sex Subgroup Quartile Comparisons, Forest Plots

Figure S3b. Median Steps/d for Quartiles by Sex Among Studies Included in Sex Stratified Spline Analysis

Figure S3c. Sex Stratified Restricted Cubic Spline

### Section 6. Sensitivity Results [Click to View](#) (page 20)

Figure S4. Stratified Results by Publication Status, Forest Plots

Figure S5. Stratified Results by Device Type, Forest Plots

Table S3. Leave-One-Study Out

Table S4. Fixed vs Random Effect Models - Summary Results

### Section 7. Stepping Rate results [Click to View](#) (page 24)

Table S5. Stepping Rate Associations with CVD With and Without Adjusting for Volume

Figure S6a. Peak 30-Minute, Forest Plots

Figure S6b. Study Level Peak 30-Minute Medians by Quartile

Figure S7a. Peak 60-Minute, Forest Plots

Figure S7b. Study Level Peak 60-Minute Medians by Quartile

Figure S8a. Time Spent at  $\geq 40$  steps/min, Forest Plots

Figure S8b. Study Level Time Spent at  $\geq 40$  steps/min Medians by Quartile

Figure S9a. Time Spent at  $\geq 100$  steps/min, Forest Plots

Figure S9b. Study Level Time Spent at  $\geq 100$  steps/min Medians by Quartile

**Table S1a. Study Level Descriptions of Data Collection and Processing**

| Study                                                           | Case Ascertainment                                                                                                                                                                                 | Device Type (wear location), Settings, Instructions                                                                                                                                                                                    | Stepping Metrics Included                                        | Device Wear Criteria                                                            | Summary of Covariates in Final Model                                                                                                                                                             |
|-----------------------------------------------------------------|----------------------------------------------------------------------------------------------------------------------------------------------------------------------------------------------------|----------------------------------------------------------------------------------------------------------------------------------------------------------------------------------------------------------------------------------------|------------------------------------------------------------------|---------------------------------------------------------------------------------|--------------------------------------------------------------------------------------------------------------------------------------------------------------------------------------------------|
| Atherosclerosis Risk in Communities (ARIC) Study                | Fatal and nonfatal: physician adjudicated probable myocardial infarction (MI) or definite fatal CHD based on ARIC criteria or coronary revascularization; HF and Stroke by hospitalization record; | ActiGraph wGT3X-bet (waist); 60 second epochs; 7 consecutive days during waking hours                                                                                                                                                  | Peak 30 min.                                                     | Device worn for 10 hrs/day for ≥ 3 days                                         | Age, sex, race/Ethnicity, education, BMI, device wear time, smoking status, alcohol consumption, hypertension, diabetes, high cholesterol, cancer, self-rated health                             |
| British Regional Heart Study (BRHS)                             | Fatal and nonfatal; physician adjudicated diagnosis MI, HF, or stroke (with symptoms lasting > 24 hours)                                                                                           | ActiGraph GT3X (waist), 60 second epochs; 7 consecutive days during waking hours                                                                                                                                                       | None                                                             | Device worn for 10h/d on ≥4 days                                                | Age, sex, occupation, BMI, device wear time, smoking status, region of residence, alcohol consumption, duration of night sleep, mobility disability, living alone vs with others                 |
| Coronary Artery Risk Development in Young Adults (CARDIA) Study | Fatal and nonfatal: Physician adjudicated diagnosis of HF, CHD (MI, acute coronary syndrome, coronary revascularization) or stroke                                                                 | ActiGraph 7164 (waist); 60 seconds epochs; 7 consecutive days during waking hours                                                                                                                                                      | Peak 30 min.<br>Peak 60 min.<br>Time spent at 40+ steps per min. | Device worn for 10 hrs/day for ≥ 3 days                                         | Age, sex, race/Ethnicity, education, field center, BMI, device wear time, smoking status, healthy eating index, alcohol consumption, diabetes, hypertension, high cholesterol, self-rated health |
| Framingham Heart Study (FHS)                                    | Fatal and nonfatal: Physician adjudicated CHD (coronary insufficiency syndrome/myocardial infarction), HF, or stroke                                                                               | Actical model #198-0200-00; 30 seconds epochs (waist); During Generation 3- exam 2, participants instructed to wear the device 24 hours a day (removed time from 12-6am); for Gen 2-based exam 9 instructed to wear for wake time only | Peak 30 min.<br>Peak 60 min.<br>Time spent at 40+ steps per min. | Device worn for 10 hrs/day for ≥ 3 days                                         | Age, sex, cohort group, race/Ethnicity, education, BMI, device wear time, smoking status, hypertension, high cholesterol, cancer, self-rated health                                              |
| Healthy Ageing Initiative (HAI)                                 | Nonfatal: National Patient Register for MI, HF, or stroke                                                                                                                                          | ActiGraph GT3X (waist), 60 second epochs; 7 consecutive days during waking hours                                                                                                                                                       | None                                                             | Device worn for 10 hrs/day for ≥ 4 days                                         | Age, sex, education, income, BMI, device wear time, smoking status, marital status, hypertension, high cholesterol, cancer, antithrombotic agents, physical function                             |
| Jackson Heart Study (JHS)                                       | Fatal and nonfatal: Physician adjudicated HF, CHD, or stroke                                                                                                                                       | Yamax SW-200 pedometer (Yamax Corp., Tokyo, (waist). 3-day monitoring sessions that was repeated for a maximum of three separate occasions within a 6 month period (i.e. max 9 days total)                                             | None                                                             | Device worn for ≥ 3 consecutive days for at least one of the assessment periods | Age, sex, race, education, BMI, hypertension, high cholesterol, smoking status, alcohol consumption, hypertension, Type 2 diabetes,                                                              |

Additional studies on next page

BMI = Body Mass Index; HF = Heart Failure; CHD = Coronary Heart Disease; CVD = Cardiovascular Disease; LFE = Low Frequency Extension

**Table S1a cont. Study Level Descriptions of Data Collection and Processing**

| Study                                                                                       | Case Ascertainment                                                                                                        | Device Type (wear location), Settings, Instructions                                                                                                                                                   | Stepping Metrics Included | Device Wear Criteria               | Summary of Covariates in Final Model                                                                                                                                     |
|---------------------------------------------------------------------------------------------|---------------------------------------------------------------------------------------------------------------------------|-------------------------------------------------------------------------------------------------------------------------------------------------------------------------------------------------------|---------------------------|------------------------------------|--------------------------------------------------------------------------------------------------------------------------------------------------------------------------|
| Lifestyle Interventions and Independence for elders (LIFE)                                  | Fatal and nonfatal: Physician adjudicated HF, CHD (MI, angina, revascularization), or stroke or transient ischemic attack | ActiGraph GT3X (waist), 7 consecutive days during waking hours                                                                                                                                        | Peak 30 min.              | device worn for 7 consecutive days | Age, sex, race, education, BMI, hypertension, high cholesterol, smoking status, hypertension, Type 2 diabetes, high cholesterol, blood pressure, previous history of CVD |
| Nateglinide and Valsartan in Impaired Glucose Tolerance Outcomes Research trial (NAVIGATOR) | Fatal and nonfatal: Physician adjudicated CHD (MI, angina, revascularization), or stroke or transient ischemic attack     | Accusplit AE120 pedometer (waist) ; instructed to wear it during waking hours for 7 consecutive days. Participants were given a log book to write down their daily step count at the end of each day. | None                      | Steps per day recorded for 7 days  | Age, sex, race/Ethnicity, socio-economic status BMI, smoking status, previous history of CVD, diabetes, high cholesterol, cancer, emphysema,                             |

BMI = Body Mass Index; HF = Heart Failure; CHD = Coronary Heart Disease; CVD = Cardiovascular Disease; LFE = Low Frequency Extension

# Table S1b. Study Level Description of Covariates in Final Model

| Study     | Detailed Description of Covariates in Final Model                                                                                                                                                                                                                                                                                                                                                                                                                                                                                   |
|-----------|-------------------------------------------------------------------------------------------------------------------------------------------------------------------------------------------------------------------------------------------------------------------------------------------------------------------------------------------------------------------------------------------------------------------------------------------------------------------------------------------------------------------------------------|
| ARIC      | age, sex, race/Ethnicity, education (< high school, high school grad, > high school), body mass index (kg/m <sup>2</sup> ), device wear time, smoking status (current, non-smoker), alcohol consumption, Systolic blood pressure (mmHg), hypertension medications (yes/no), HDL cholesterol (mg/dL), LDL cholesterol (mg/dL), triglycerides (mg/dL), diabetes (fasting glucose ≥126 mg/dL or non-fasting ≥200 mg/dL, or taking diabetes medication or self reported diagnosis by a physician, self-rated health                     |
| BRHS      | age, occupation (manual, non-manual labor), body mass index (kg/m <sup>2</sup> ), device wear time, smoking (current, past, never), region of residence, alcohol consumption, hours of night-time sleep, living alone vs with others, mobility disability (Mobility disability was present if reported being unable to do any of: (1) walking 200 yards without stopping and without discomfort, (2) climbing a flight of 12 stairs without holding on and taking a rest, or (3) bending down and picking up a shoe from the floor) |
| CARDIA    | age, sex, race/Ethnicity, education (years), body mass index (kg/m <sup>2</sup> ), device wear time, smoking status (current, former, never), alcohol consumption, healthy eating index score, stage 2 hypertension (systolic pressure ≥ 140 mm Hg and/or diastolic pressure is ≥ 90 mm Hg and/or taking medication), High cholesterol (≥200 mg/dL total cholesterol), Diabetes (fasting glucose ≥126 mg/dL or non-fasting ≥200 mg/dL, or taking diabetes medication), self-rated health                                            |
| FHS       | age, sex, race/Ethnicity, education (< high school, high school grad, > high school), body mass index (kg/m <sup>2</sup> ), cohort, smoking status (current, non-smoker), device wear time, alcohol consumption, stage 1 hypertension (systolic pressure ≥ 130 mm Hg and/or diastolic pressure is ≥ 80 mm Hg and/or taking medication), high cholesterol (self-reported taking medication to lower cholesterol), self-rated health                                                                                                  |
| HAI       | sex, education (primary, secondary, post-secondary), body mass index (kg/m <sup>2</sup> ), smoking status (current, non-smoker), device wear time, diabetes (self-reported or physician diagnosis), hypertension (≥ 140 mm Hg and/or diastolic pressure is ≥ 90 mm Hg or taking medication), high cholesterol (>240 mg/dL or taking medication), cancer diagnosis, marital status (married, unmarried, divorced, widowed), household income (continuous as Swedish Krona), physical function (timed-up-and-go test)                 |
| JHS       | age, sex, education (< high school, high school graduate, > high school), body mass index (kg/m <sup>2</sup> ), alcohol consumption, smoking status (current, non-smoker), stage 2 hypertension (Systolic pressure ≥ 140 mm Hg and/or diastolic pressure is ≥ 90 mm Hg and/or taking medication), high LDL cholesterol (≥ 160 mg/dL)                                                                                                                                                                                                |
| LIFE      | Age, sex, race, education (high school, college, post-graduate, others), intervention arm, device wear time, marital status (currently married, unmarried), live alone, body mass index (kg/m <sup>2</sup> ), smoking status (current, former, never), diabetes (physician diagnosis), systolic blood pressure (mmHg), intake of anti-hypertensive medications, lipid lowering medication, previous history of CVD, self-rated health                                                                                               |
| NAVIGATOR | Age, sex, body-mass index (kg/m <sup>2</sup> ), region (North America, Europe, Asia, Latin America, other), randomized medication treatment group, smoking status (current, non), diabetes, LDL cholesterol, antihypertensive medication use, previous history of CVD.                                                                                                                                                                                                                                                              |

**Table S1c. Study Level Descriptive Characteristics of Participants**

|                                                 | ARIC        |             | BRHS        | CARDIA      |             | FHS         |             |
|-------------------------------------------------|-------------|-------------|-------------|-------------|-------------|-------------|-------------|
|                                                 | Men         | Women       | Men         | Men         | Women       | Men         | Women       |
| N                                               | 266         | 186         | 1172        | 891         | 1194        | 1901        | 2322        |
| Age (y), mean (SD)                              | 78.0 (4.5)  | 79.1 (4.8)  | 78.28 (4.5) | 45.2 (3.5)  | 45.2 (3.7)  | 54.1 (14.0) | 54.5 (13.8) |
| BMI (kg/m <sup>2</sup> ), mean (SD)             | 27.7 (5.3)  | 28.5 (4.4)  | 27.1 (3.8)  | 28.8 (6.4)  | 29.2 (7.3)  | 28.76 (4.7) | 27.28 (5.7) |
| BMI Categories, n (%)                           |             |             |             |             |             |             |             |
| BMI < 25.0 kg/m <sup>2</sup>                    | 82 (31)     | 43 (23)     | 342 (29)    | 216 (24)    | 411 (34)    | 386 (20)    | 950 (41)    |
| BMI: 25.0 - < 30.0 kg/m <sup>2</sup>            | 106 (40)    | 82 (44)     | 611 (52)    | 402 (45)    | 329 (28)    | 895 (47)    | 768 (33)    |
| BMI ≥30.0 kg/m <sup>2</sup>                     | 78 (29)     | 61 (33)     | 291 (19)    | 273 (31)    | 454 (38)    | 620 (33)    | 604 (26)    |
| race/Ethnicity, n (%)                           |             |             |             |             |             |             |             |
| Non-Hispanic White                              | 202 (76)    | 159 (85)    | >99%        | 562 (63)    | 646 (54)    | 1722 (91)   | 2082 (90)   |
| Non-Hispanic Black                              | 64 (24)     | 27 (15)     | -           | 329 (37)    | 548 (46)    | -           | -           |
| Asian                                           | -           | -           | -           | -           | -           | -           | -           |
| Hispanic                                        | -           | -           | -           | -           | -           | -           | -           |
| Other Race                                      | -           | -           | -           | -           | -           | -           | -           |
| Hypertension (Stage 2), n (%)                   | 197 (74)    | 143 (77)    | 1004 (86)   | 156 (18)    | 240 (20)    | 1138 (60)   | 1009 (43)   |
| High total cholesterol, n (%)                   | 104 (39)    | 29 (16)     | 617 (53)    | 609 (68)    | 564 (47)    | 587 (31)    | 529 (23)    |
| Diabetes, n (%)                                 | 62 (23)     | 61 (33)     | 163 (14)    | 68 (8)      | 93 (8)      | -           | -           |
| History of Cancer, n (%)                        | 0           | 1 (0.5)     | 181 (15)    | -           | -           | 225 (12)    | 336 (14)    |
| Average Steps/day, mean (SD)                    | 3353 (1760) | 3580 (1841) | 4985 (2758) | 9819 (3231) | 9186 (2914) | 7721 (4072) | 6869 (3551) |
| No. of days of compliant device wear, mean (SD) | 7.1 (2.4)   | 6.7 (1.9)   | -           | 7.0 (1.41)  | 6.9 (1.4)   | 7.4 (1.32)  | 7.3 (1.4)   |
| Minutes/day of device wear, mean (SD)           | 847 (102)   | 849 (89)    | -           | 871 (86)    | 855 (83)    | 915 (94)    | 910 (93)    |

**Table S1c continued.** Study Level Descriptive Characteristics of Participants

|                                                 | HAI         |             | JHS         |             | LIFE        |             | NAVIGATOR   |             |
|-------------------------------------------------|-------------|-------------|-------------|-------------|-------------|-------------|-------------|-------------|
|                                                 | Men         | Women       | Men         | Women       | Men         | Women       | Men         | Women       |
| N                                               | 1445        | 1762        | 157         | 244         | 448         | 893         | 3573        | 3698        |
| Age (y), mean (SD)                              | 70.4 (0.1)  | 70.4 (0.1)  | 59.0 (10.5) | 61.0 (9.3)  | 79.3 (5.2)  | 78.5 (5.3)  | 63.9 (7.0)  | 63.6 (7.7)  |
| BMI (kg/m <sup>2</sup> ), mean (SD)             | 26.5 (3.6)  | 26.3 (4.6)  | 29.4 (6.2)  | 31.9 (7.1)  | 30.1 (5.5)  | 30.5 (6.3)  | 29.6 (4.6)  | 31.2 (5.9)  |
| BMI Categories, n (%)                           |             |             |             |             |             |             |             |             |
| BMI < 25.0 kg/m <sup>2</sup>                    | 499 (40)    | 791 (45)    | 28 (18)     | 28 (11)     | 71 (16)     | 172 (19)    | 452 (12)    | 466 (13)    |
| BMI 25.0 -< 30.0 kg/m <sup>2</sup>              | 725 (43)    | 657 (37)    | 67 (43)     | 78 (32)     | 181 (40)    | 285 (32)    | 1671 (47)   | 1265 (34)   |
| BMI ≥30.0 kg/m <sup>2</sup>                     | 221 (17)    | 314 (18)    | 62 (39)     | 138 (57)    | 196 (44)    | 436 (49)    | 1450 (41)   | 1967 (53)   |
| race/Ethnicity, n (%)                           |             |             |             |             |             |             |             |             |
| Non-Hispanic White                              | >99%        | >99%        | -           | -           | 385 (86)    | 635 (71)    | 3006 (84)   | 2956 (80)   |
| Non-Hispanic Black                              | -           | -           | 157 (100)   | 244 (100)   | 42 (9)      | 196 (22)    | 65 (2)      | 101 (3)     |
| Asian                                           | -           | -           | -           | -           | 4 (1)       | 7 (1)       | 276 (8)     | 270 (7)     |
| Hispanic                                        | -           | -           | -           | -           | 10 (2)      | 40 (4)      | -           | -           |
| Other Race                                      | -           | -           | -           | -           | 7 (2)       | 15 (2)      | 226 (6)     | 371 (10)    |
| Hypertension (Stage 2), n (%)                   | 1144 (79)   | 1378 (78)   | 90 (57)     | 166(68)     | 393 (88)    | 753 (84)    | 2677 (75)   | 2998 (81)   |
| High total cholesterol, n (%)                   | 765 (53)    | 1123 (64)   | 22 (14)     | 40 (16)     | 318 (71)    | 591 (66)    | 1656 (46)   | 1604 (43)   |
| Diabetes, n (%)                                 | 138 (10)    | 107 (6)     | -           | -           | 147 (32)    | 232 (26)    | 1191 (33)   | 1530 (41)   |
| History of Cancer, n (%)                        | -           | -           | -           | -           | -           | -           | 57 (2)      | 74 (2)      |
| Average Steps/day, mean (SD)                    | 7243 (3036) | 7248 (3138) | 6386 (4031) | 4941 (3693) | 2691 (1623) | 2657 (1399) | 5945 (3961) | 6600 (4803) |
| No. of days of compliant device wear, mean (SD) | 7 (0.9)     | 7(0.8)      | -           | -           | 7.9 (3.2)   | 8.0 (3.3)   | 6.3 (1.0)   | 6.6 (1.0)   |
| Minutes/day of device wear, mean (SD)           | 883 (101)   | 873 (94)    | -           | -           | 834 (104)   | 838 (114)   | -           | -           |

BMI = Body Mass Index, measured by height and weight during study examinations

Table S2: Study Quality Assessment

| Newcastle-Ottawa Quality Assessment of Studies |                    |           |                        |         |               |            |           |          |               |
|------------------------------------------------|--------------------|-----------|------------------------|---------|---------------|------------|-----------|----------|---------------|
| Study                                          |                    | Selection |                        |         | Comparability | Outcome    |           |          | Overall Score |
|                                                | Representativeness | Selection | Ascertainment Exposure | Outcome |               | Assessment | Follow-Up | Adequacy |               |
| ARIC                                           | B*                 | A*        | A*                     | A*      | A* B*         | A *        | A*        | B*       | 9             |
| BRHS                                           | C                  | A*        | A*                     | A*      | A* B*         | A *        | A*        | B*       | 8             |
| CARDIA                                         | B*                 | A*        | A*                     | A*      | A* B*         | A *        | A*        | B*       | 9             |
| FHS                                            | B*                 | A*        | A*                     | A*      | A* B*         | A *        | A*        | B*       | 9             |
| JHS                                            | B*                 | A*        | C                      | A*      | A* B*         | A *        | A*        | B*       | 8             |
| HAI                                            | B*                 | A*        | A*                     | A*      | A* B*         | B *        | A*        | B*       | 9             |
| LIFE                                           | C                  | A*        | A*                     | A*      | A* B*         | A *        | A*        | B*       | 8             |
| NAVIGATOR                                      | C                  | A*        | C                      | A*      | A* B*         | A *        | A*        | B*       | 7             |

A study can be awarded a maximum of one star for each numbered item within the Selection and Outcome categories. A maximum of two stars can be given for Comparability. Overall score sums the number of stars.

See the following page for detailed scoring descriptions (e.g. A, B, C)



## COHORT STUDIES

Note: A study can be awarded a maximum of one star for each numbered item within the Selection and Outcome categories. A maximum of two stars can be given for Comparability

### Selection

#### 1) Representativeness of the exposed cohort

- a) truly representative of the average adult in the community ✱
- b) somewhat representative of the average adult in the community ✱
- c) selected group of users e.g. nurses, volunteers, only those with a precondition/morbidity, only men or only women
- d) no description of the derivation of the cohort

#### 2) Selection of the non exposed cohort

- a) drawn from the same community as the exposed cohort ✱
- b) drawn from a different source
- c) no description of the derivation of the non exposed cohort

#### 3) Ascertainment of exposure

- a) secure record (eg surgical records) ✱
- b) structured interview ✱
- c) written self report (if participants reported their steps per day on a log)
- d) no description

#### 4) Demonstration that outcome of interest was not present at start of study

- a) yes ✱
- b) no

### Comparability

#### 1) Comparability of cohorts on the basis of the design or analysis

- a) study controls for AGE (select the most important factor) ✱
- b) study controls for any additional factors (gender, SES, and CVD risk factors (e.g. diabetes, hypertension, high cholesterol, BMI) ✱

### Outcome

#### 1) Assessment of outcome

- a) independent blind assessment ✱
- b) record linkage ✱
- c) self report
- d) no description

#### 2) Was follow-up long enough for outcomes to occur

- a) yes (at least 2 years) ✱
- b) no

#### 3) Adequacy of follow up of cohorts

- a) complete follow up - all subjects accounted for ✱
- b) subjects lost to follow up unlikely to introduce bias ✱
- c) follow up rate low and no description of those lost
- d) no statement

# Figure S1a: Overall Sample Quartile Comparisons – Forest Plots

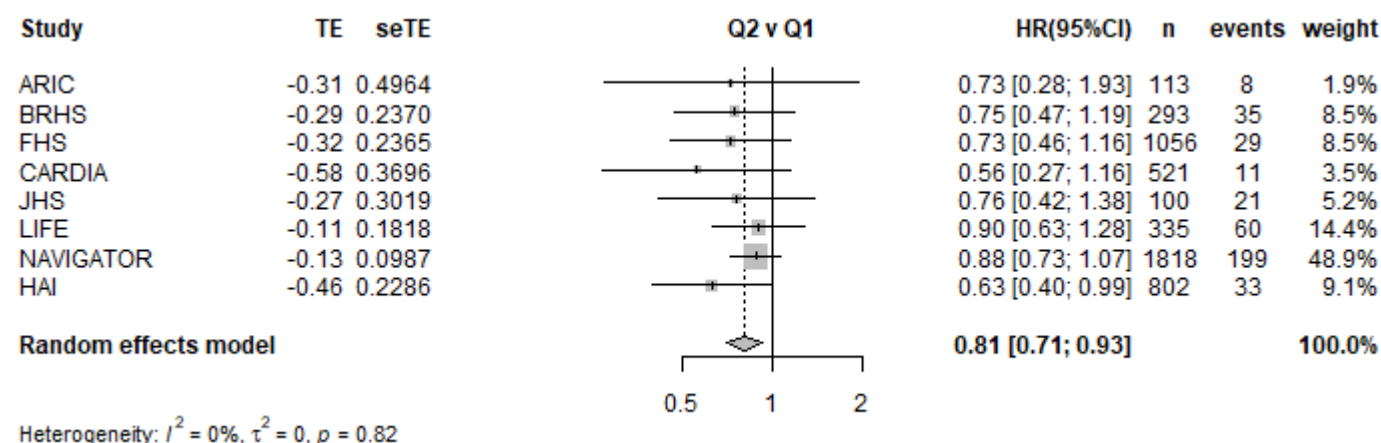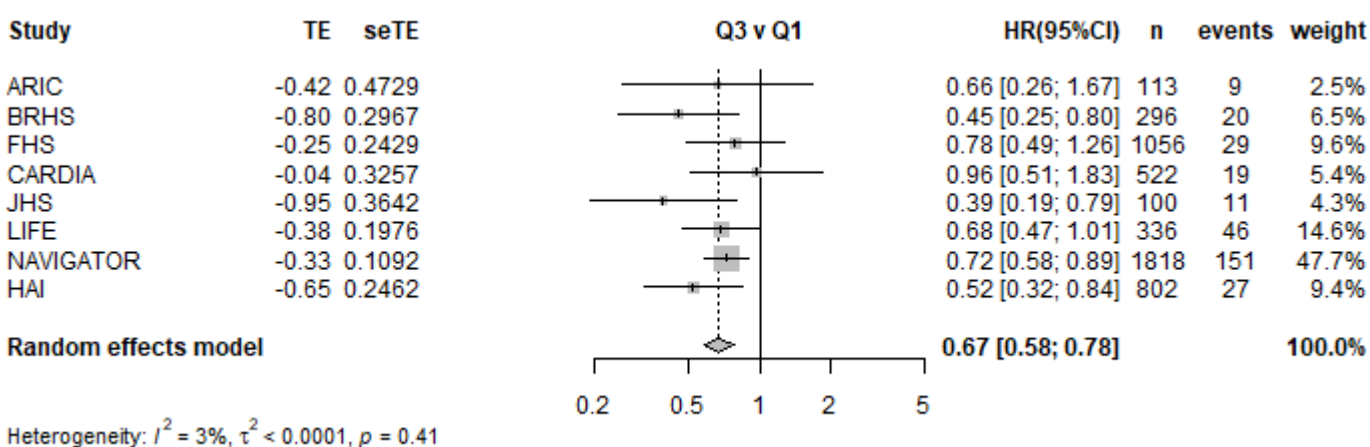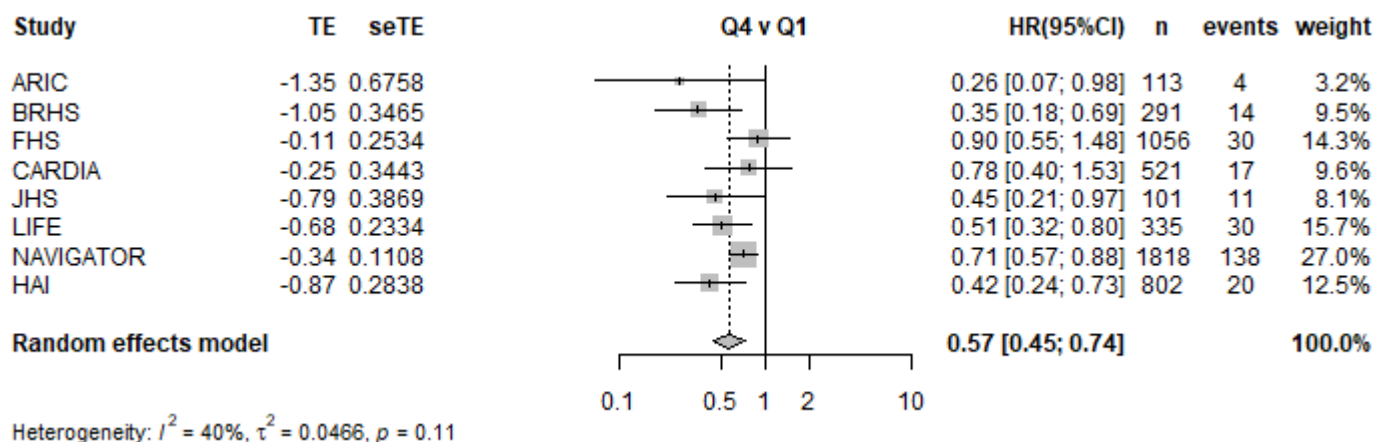

TE = treatment Effect (log hazard ratio); sTE = standard error of treatment estimate; Q = Quartile; HR (95% CI) = Hazard Ratio and 95% Confidence Intervals.  
 Model is adjusted for age, device wear time, race/Ethnicity (if applicable), sex (if applicable), education or income, body mass index, and study-specific variables for lifestyle, chronic conditions or risk factors, and general health status (see supplement 1b)

Figure S1b: Overall Sample Quartile Comparisons – Funnel Plots

Quartile 2 v 1

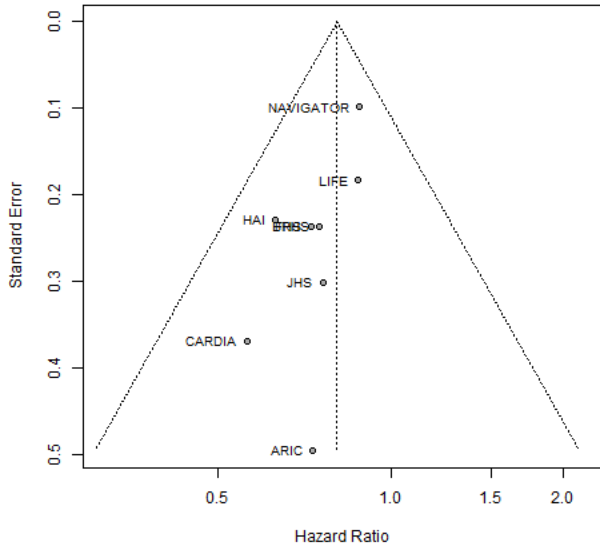

Quartile 3 v 1

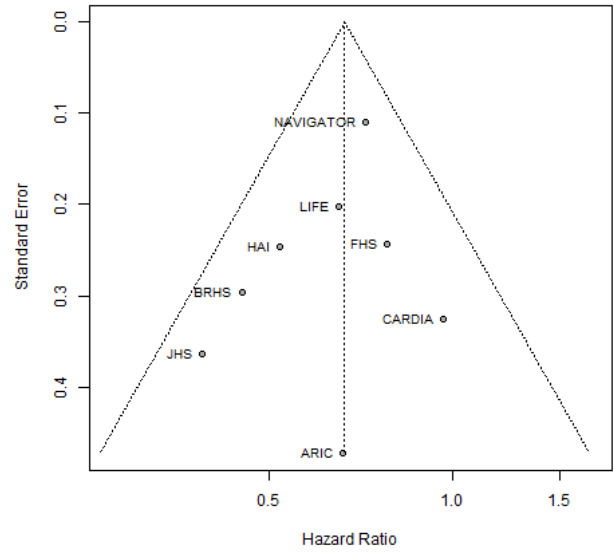

Quartile 4 v 1

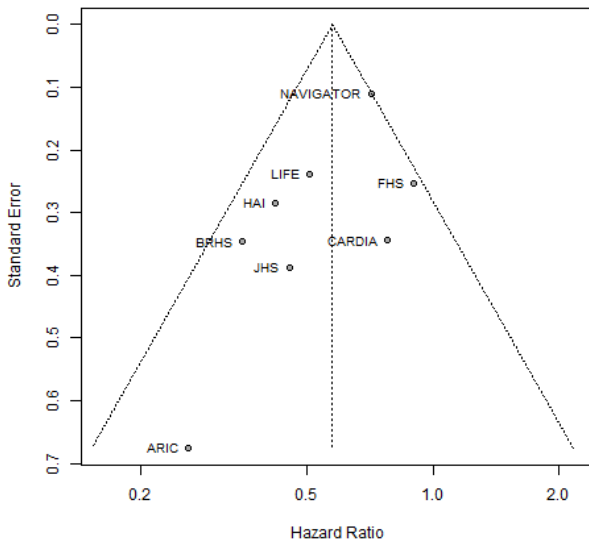

Figure S2a: Association of Steps/Day Quartiles with Cardiovascular Disease Stratified by Younger (<60 years) and Older (≥ 60 years) Adults – Forest Plots – Final Adjusted Model 2

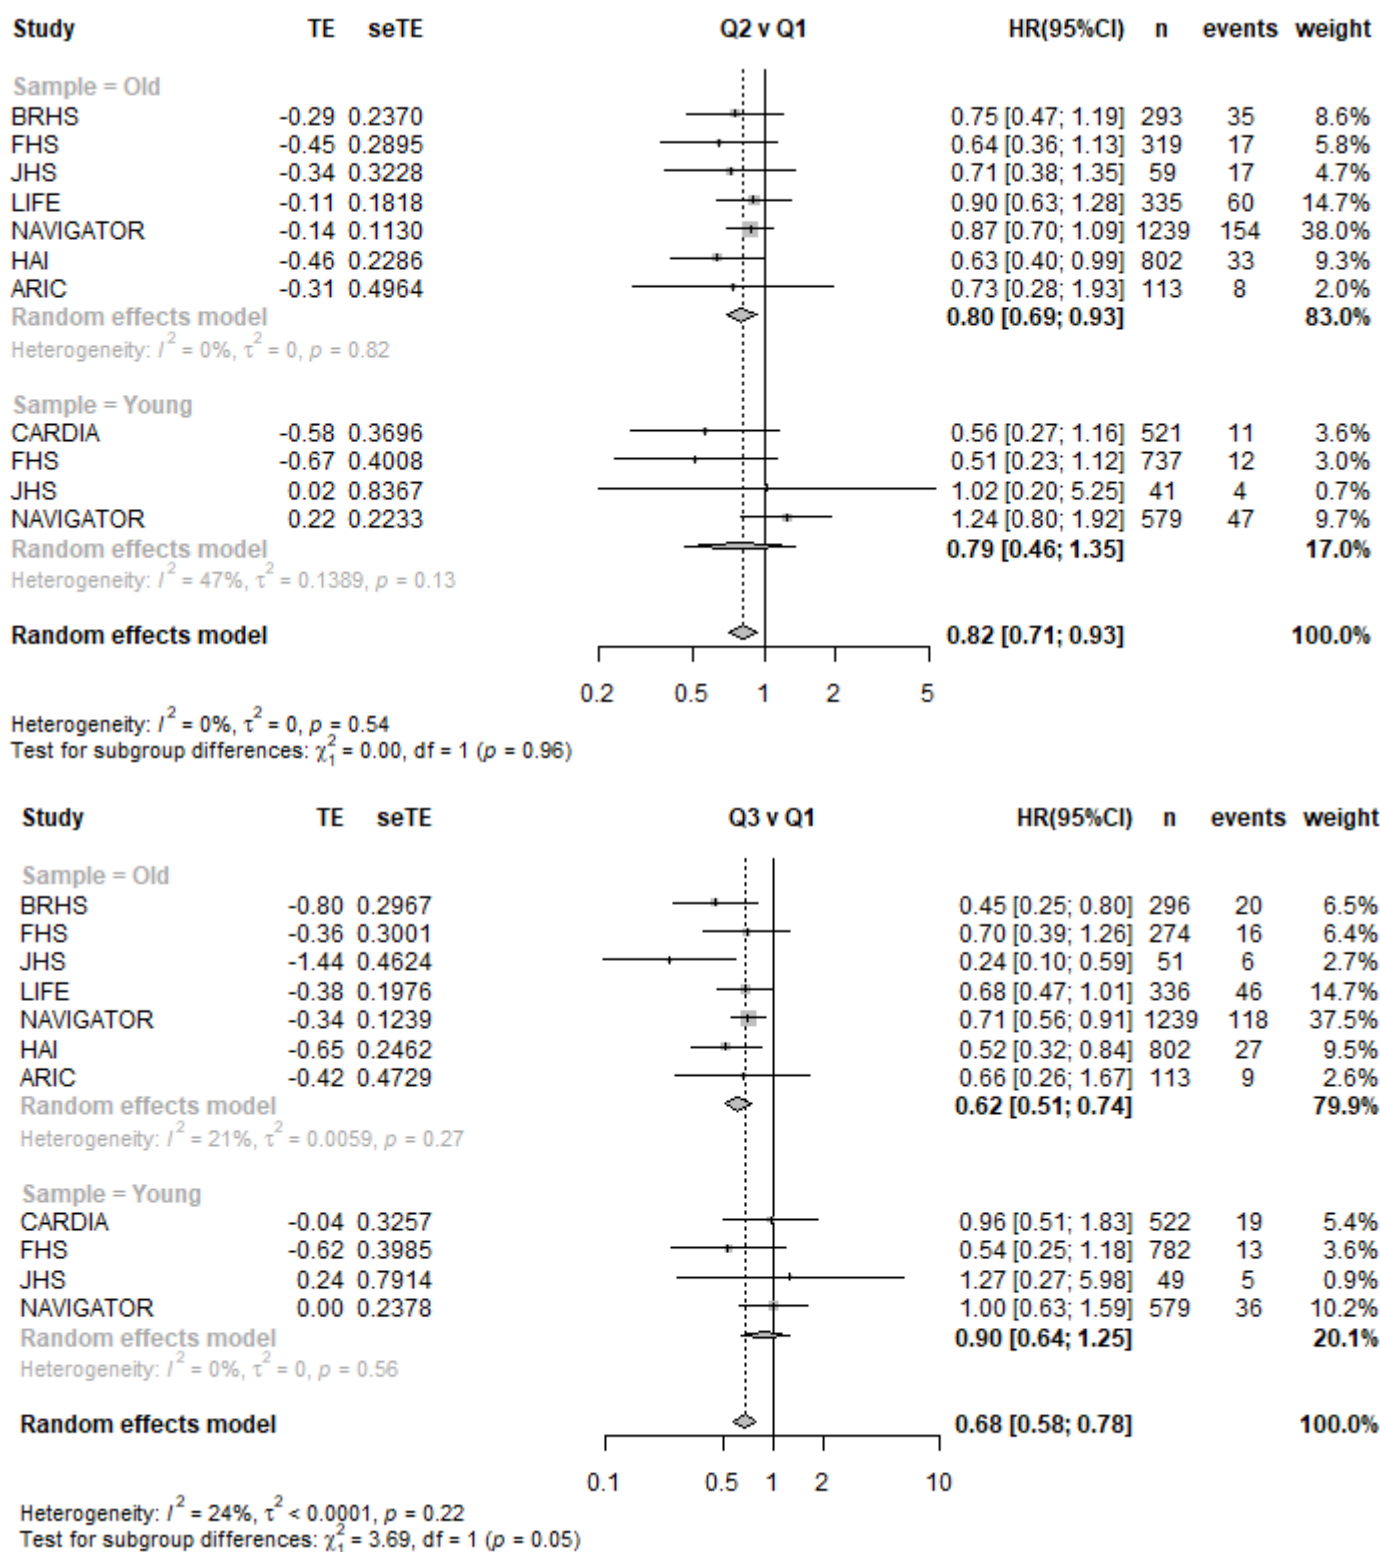

TE = treatment Effect (log hazard ratio); sTE = standard error of treatment estimate; Q = Quartile; HR (95% CI) = Hazard Ratio and 95% Confidence Intervals.

Model is adjusted for age, device wear time, race/Ethnicity (if applicable), sex (if applicable), education or income, body mass index, and study-specific variables for lifestyle, chronic conditions or risk factors, and general health status (see supplement 1b)

Figure S2a cont: Association of Steps/Day Quartiles with Cardiovascular Disease Stratified by Younger (<60 years) and Older ( $\geq 60$  years) Adults – Forest Plots – Final Adjusted Model 2

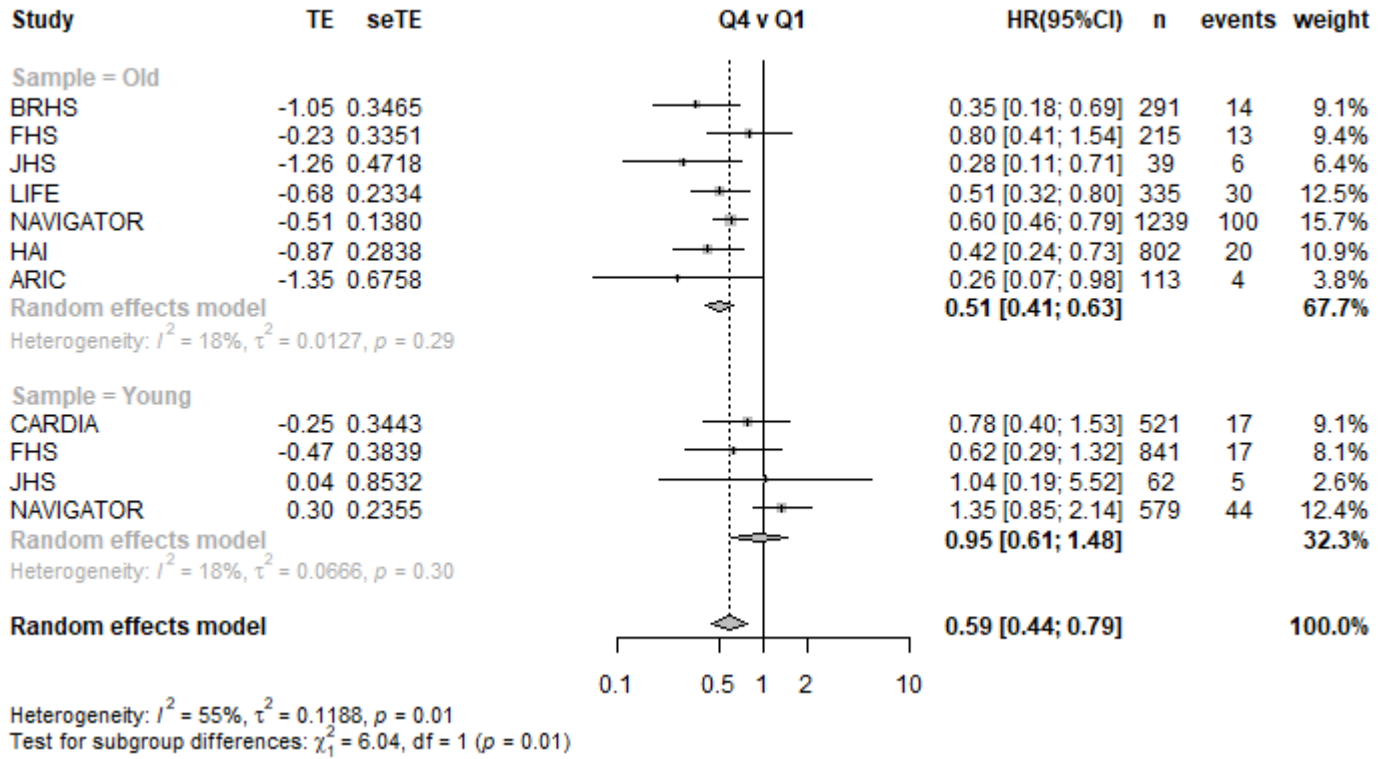

TE = treatment Effect (log hazard ratio); sTE = standard error of treatment estimate; Q = Quartile; HR (95% CI) = Hazard Ratio and 95% Confidence Intervals.

Model is adjusted for age, device wear time, race/Ethnicity (if applicable), sex (if applicable), education or income, body mass index, and study-specific variables for lifestyle, chronic conditions or risk factors, and general health status (see supplement 1b)

Figure S2b: Age Stratified Quartile Comparisons – Funnel Plots

Quartile 2 v 1

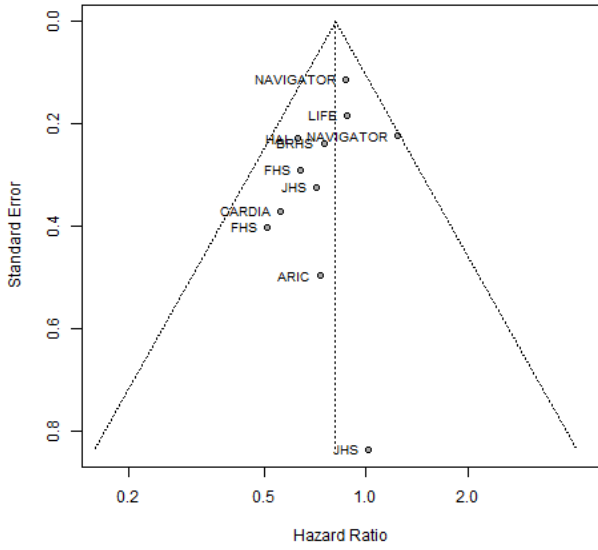

Quartile 3 v 1

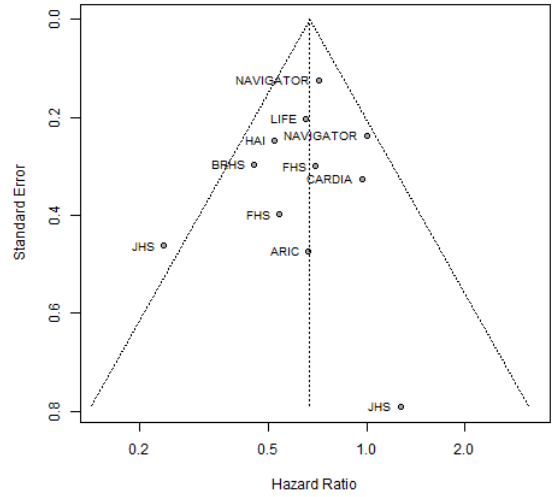

Quartile 4 v 1

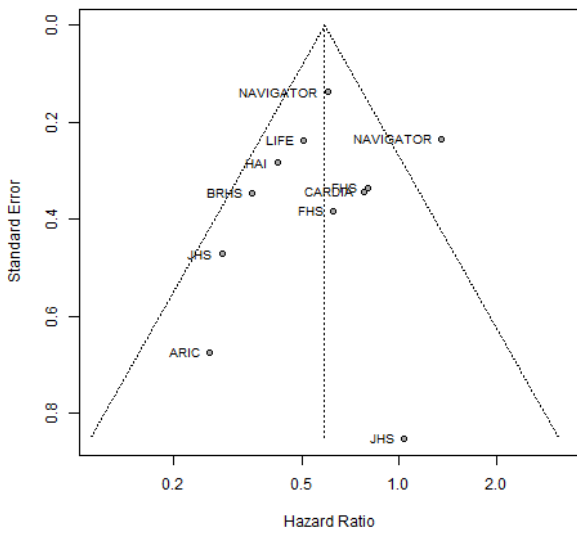

Figure S2c: Median Steps/d for Quartiles by Age Group Among Studies Included in Spline Analysis

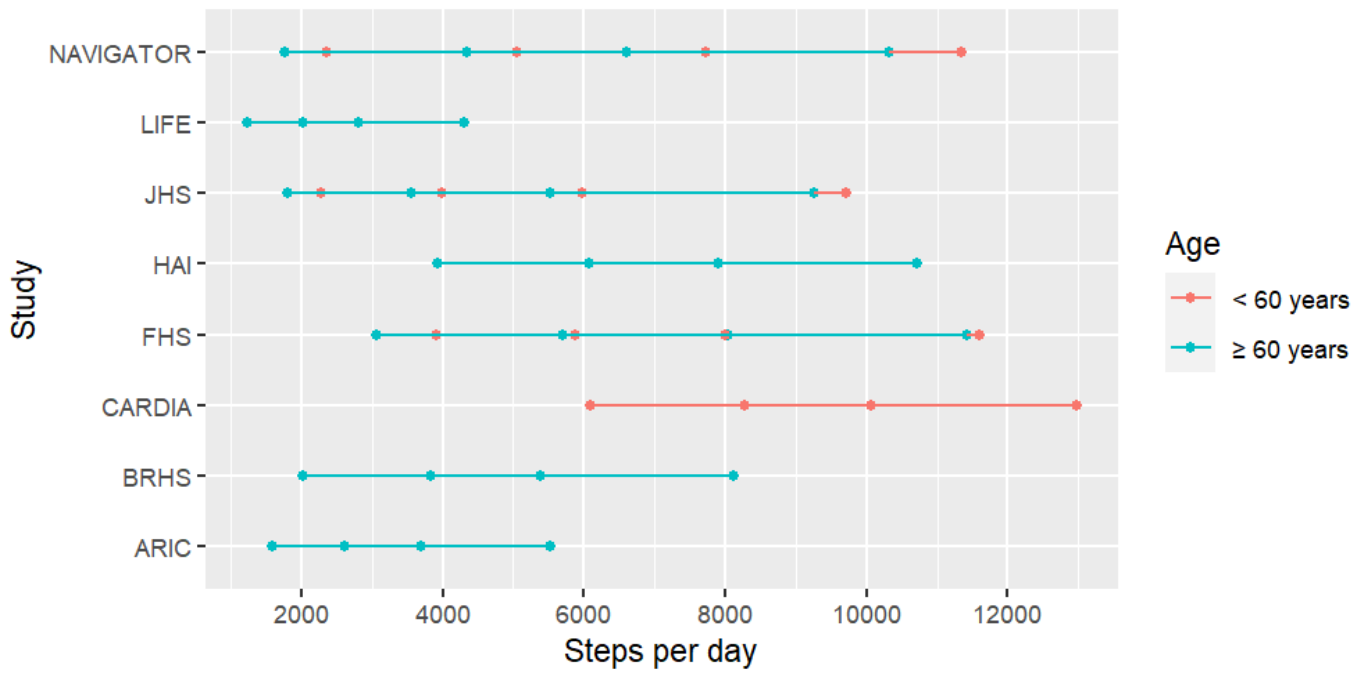

Figure S3a: Association of Steps/Day Quartiles with CVD Stratified by Sex – Forest Plots – Final Adjusted Model 2

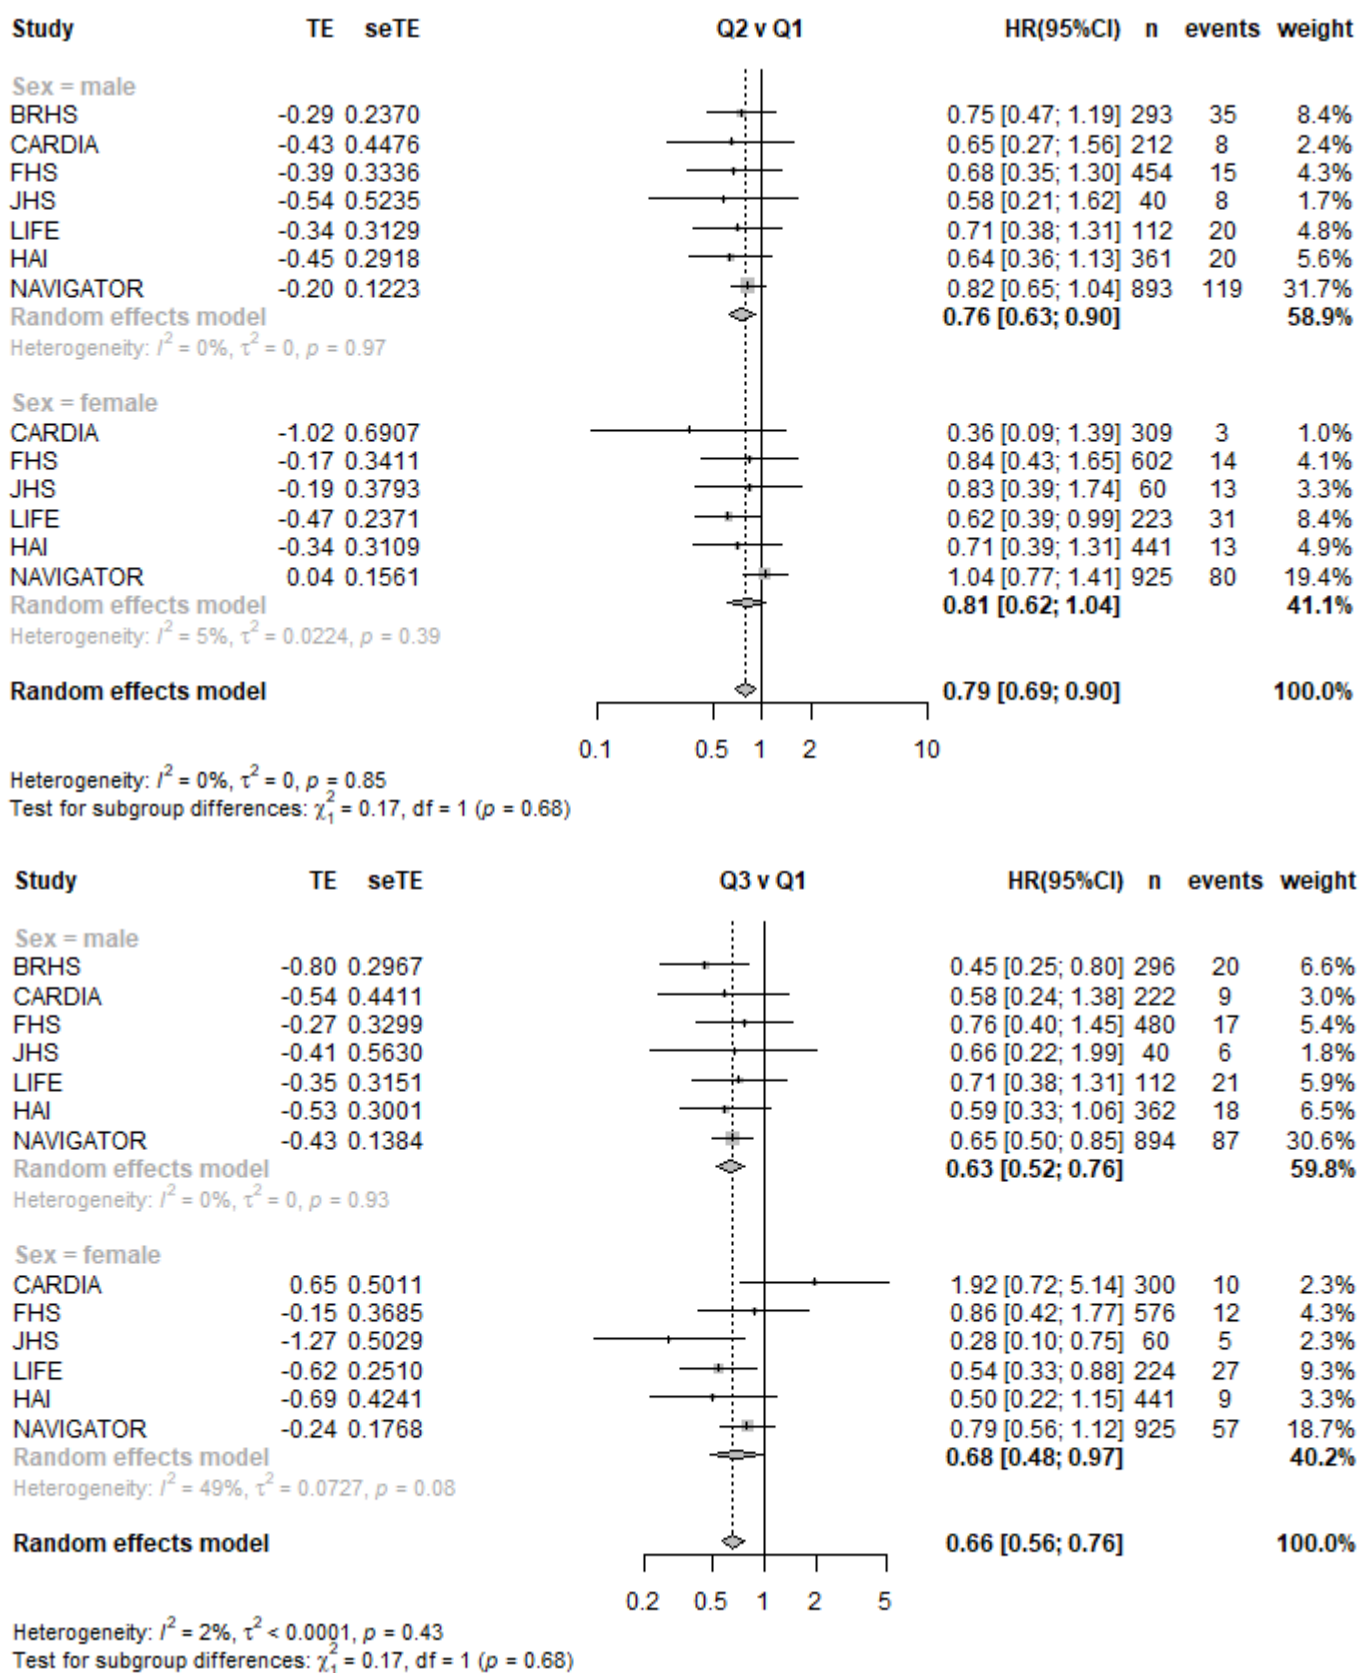

TE = treatment Effect (log hazard ratio); sTE = standard error of treatment estimate; Q = Quartile; HR (95% CI) = Hazard Ratio and 95% Confidence Intervals.

Model is adjusted for age, device wear time, race/Ethnicity (if applicable), education or income, body mass index, and study-specific variables for lifestyle, chronic conditions or risk factors, and general health status (see supplement 1b)



Figure S3a cont: Association of Steps/Day Quartiles with CVD Stratified by Sex – Forest Plots – Final Adjusted Model 2

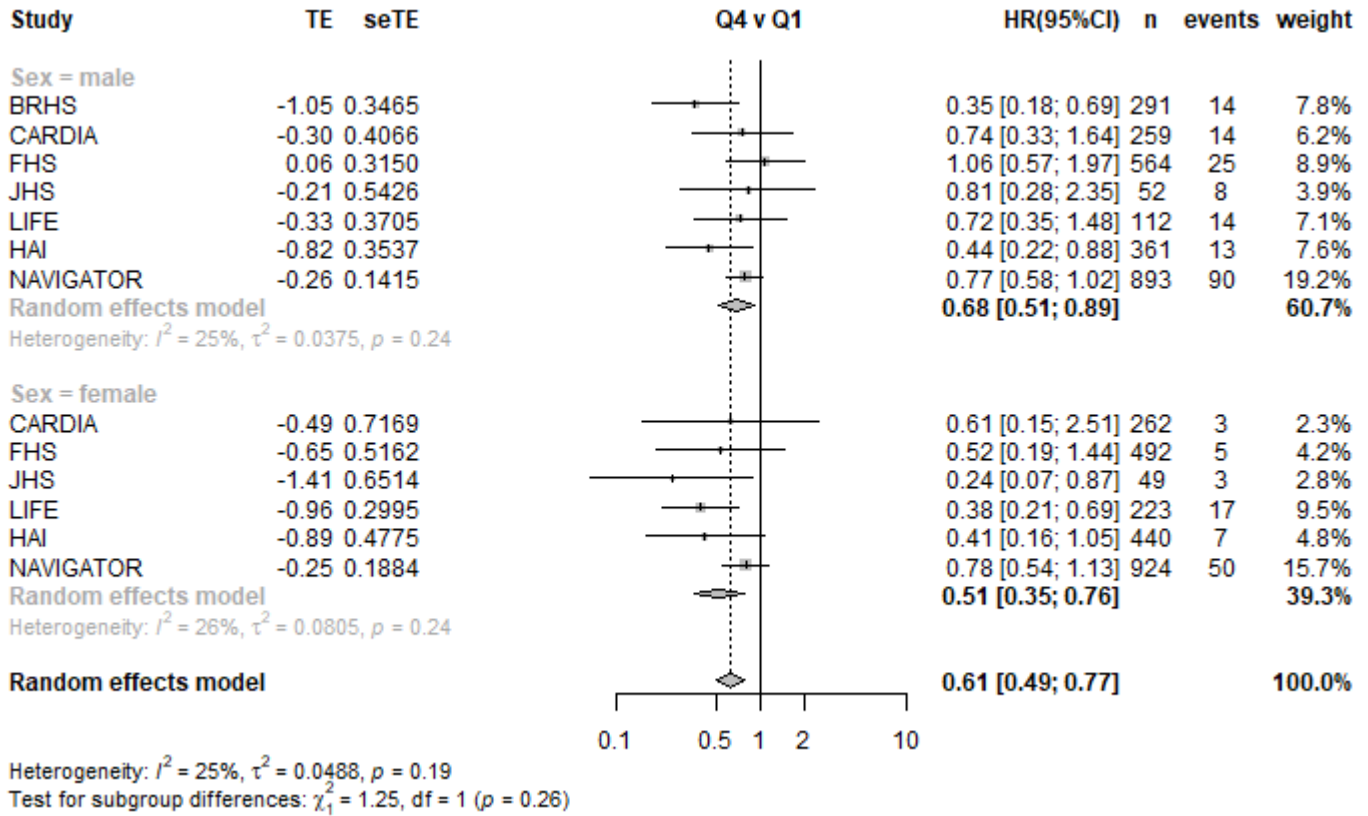

TE = treatment Effect (log hazard ratio); sTE = standard error of treatment estimate; Q = Quartile; HR (95% CI) = Hazard Ratio and 95% Confidence Intervals.

Model is adjusted for age, device wear time, race/Ethnicity (if applicable), education or income, body mass index, and study-specific variables for lifestyle, chronic conditions or risk factors, and general health status (see supplement 1b)<sup>17</sup>

Figure S3b: Sex Stratified Restricted Cubic Spline – Final adjusted Model

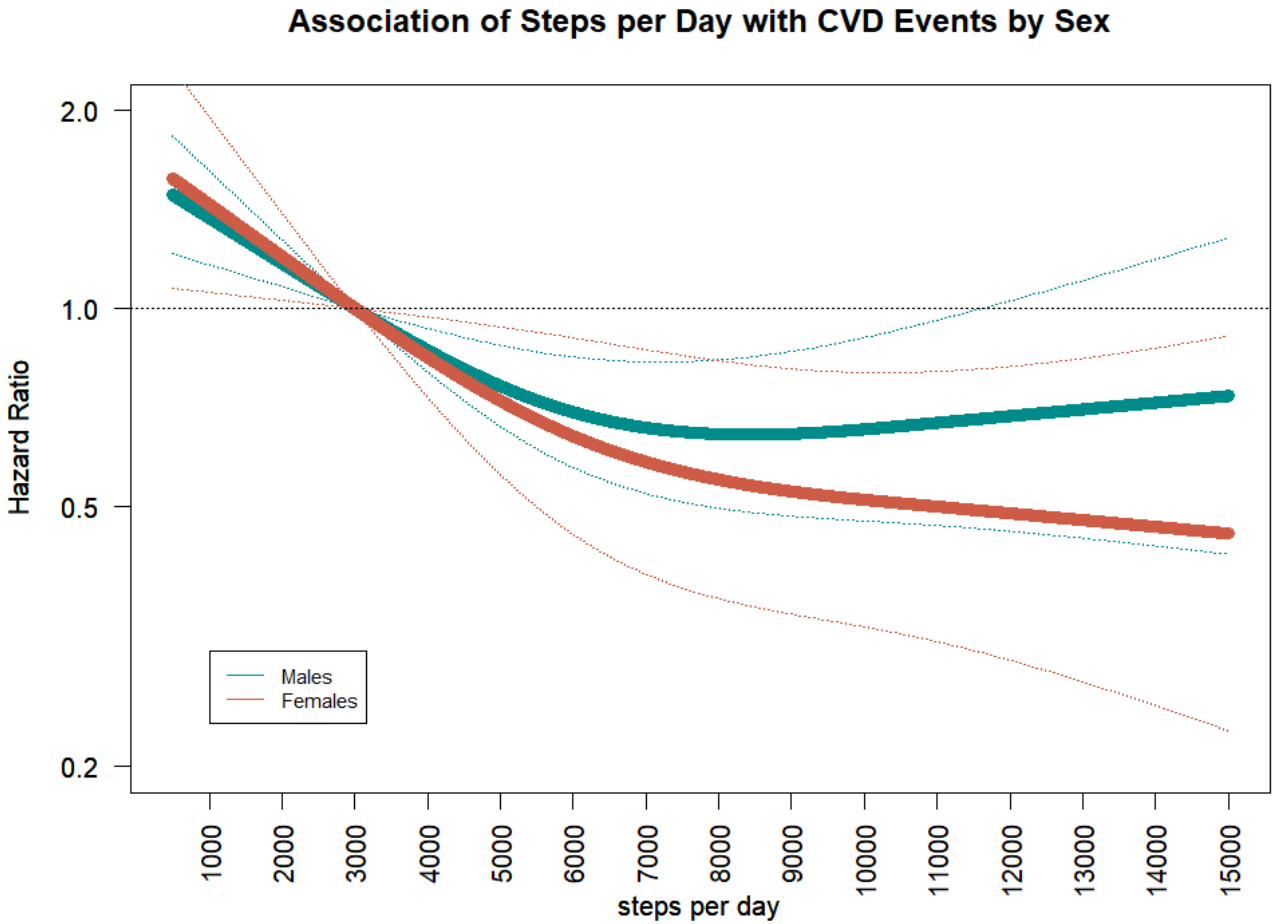

Restricted cubic splines of hazard ratios of steps per day with CVD events. Knots at 10th, 50th, and 90th, percentile of steps/d. Reference at 3000 steps/day (median of lowest quartile). Model is adjusted for age, device wear time, race/Ethnicity (if applicable), education or income, body mass index, and study-specific variables for lifestyle, chronic conditions or risk factors, and general health status (see supplement 1b)  
The y-axis is a log scale.

Wald test p-value=0.0008 for males and p-value =0.013 for females for non-linearity

Figure S3c: Median Steps/d for Quartiles by Sex among Studies Included in Sex Stratified Spline analysis

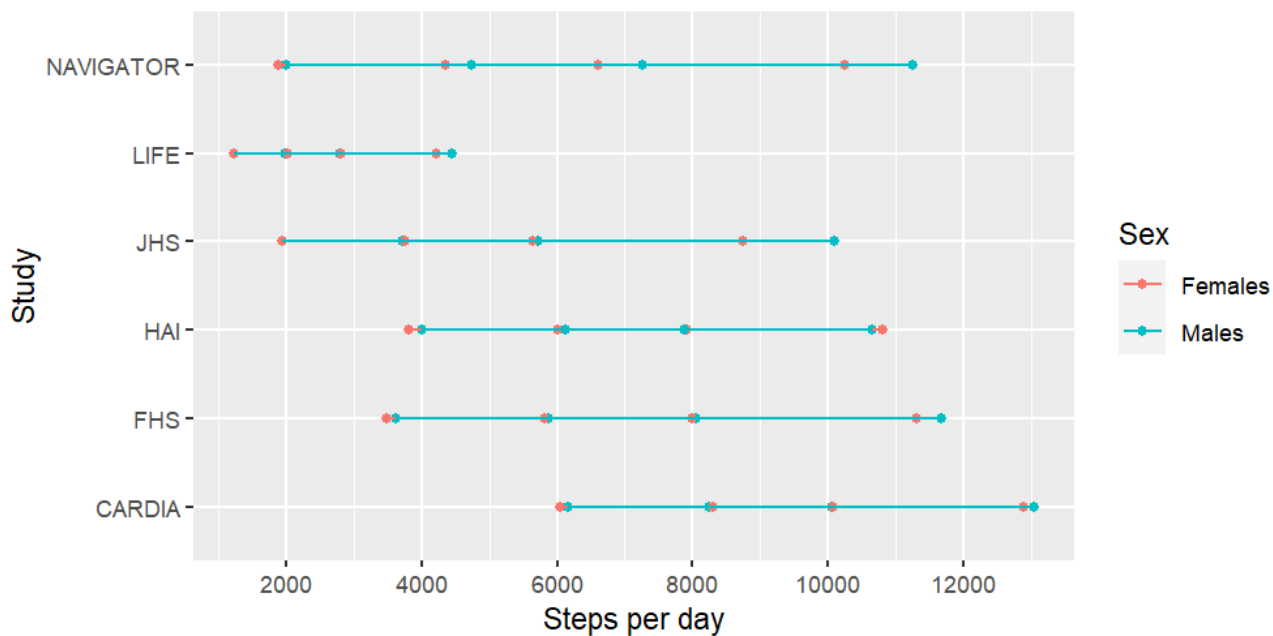

# Figure S4. Forest Plots Stratified by Publication Status (Yes/No)

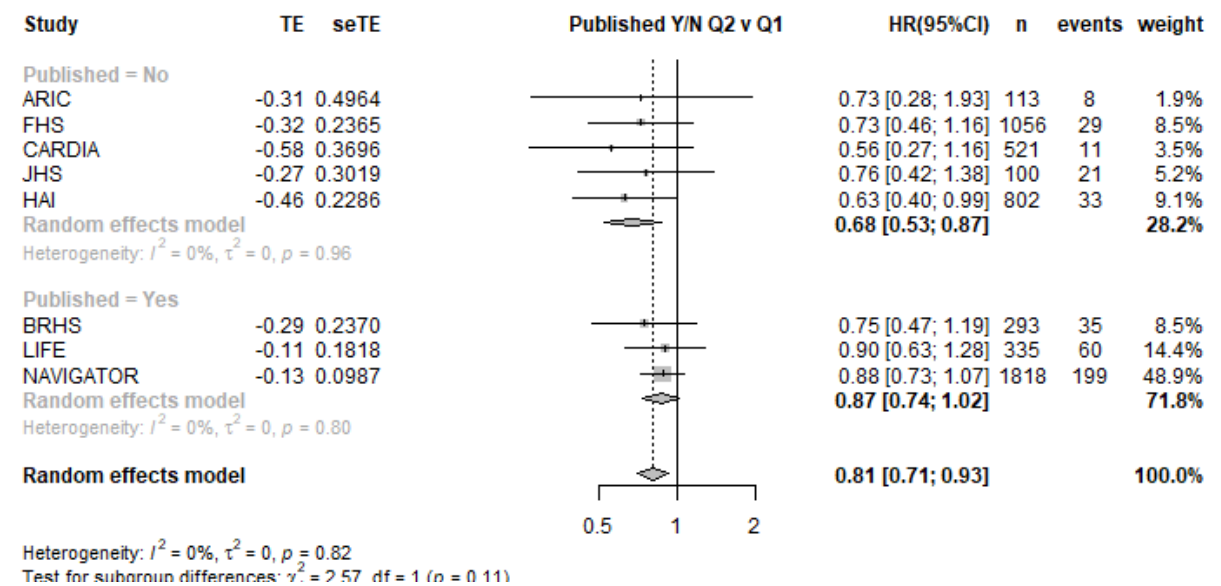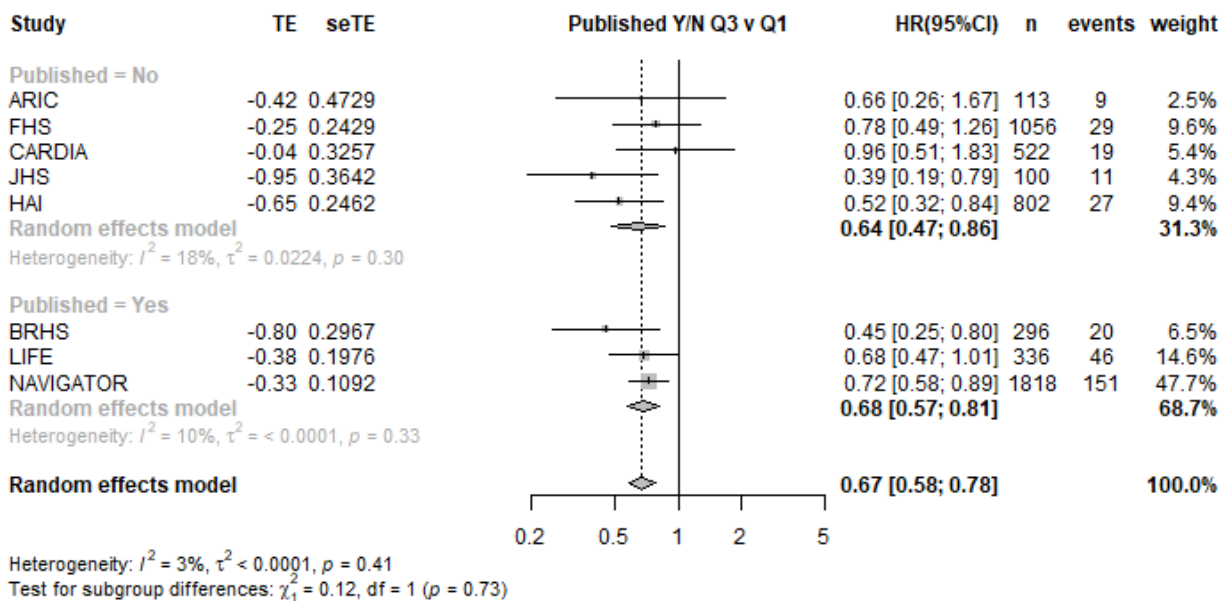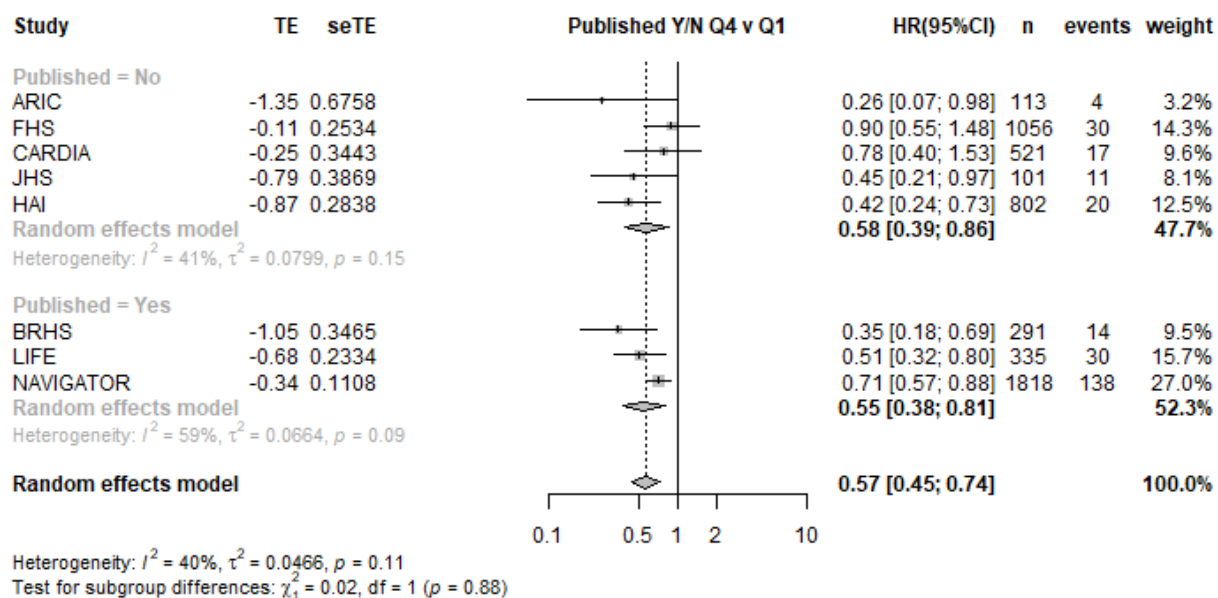

TE = treatment Effect (log hazard ratio); sTE = standard error of treatment estimate; Q = Quartile; HR (95% CI) = Hazard Ratio and 95% Confidence Intervals. Models adjusted for age, device wear time, race/Ethnicity (if applicable), sex (if applicable), education or occupation, BMI, and study-specific variables for lifestyle, chronic conditions or risk factors, and general health status (see supplement 1b)

Figure S5. Forest Plots Stratified by Device type (Accelerometer vs Pedometer)

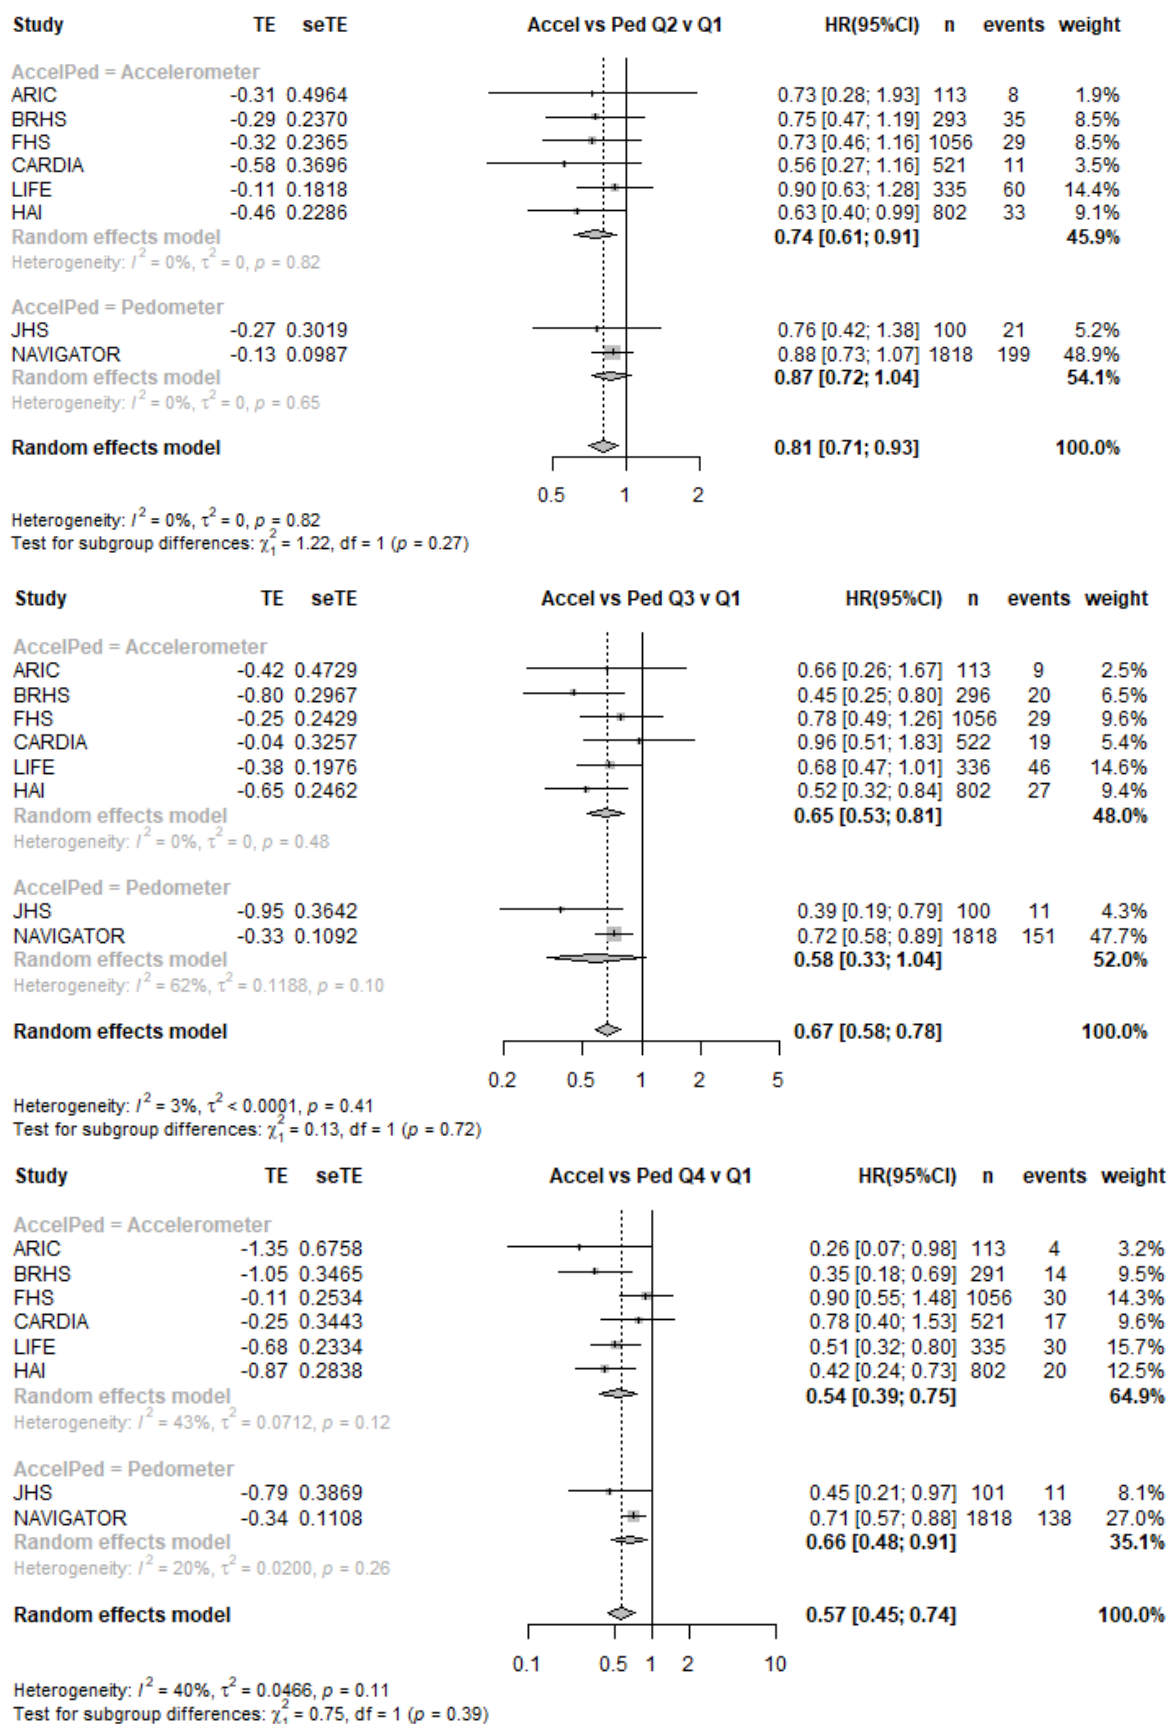

TE = treatment Effect (log hazard ratio); sTE = standard error of treatment estimate; Q = Quartile; HR (95% CI) = Hazard Ratio and 95% Confidence Intervals. Models adjusted for age, device wear time, race/Ethnicity (if applicable), sex (if applicable), education or occupation, BMI, and study-specific variables for lifestyle, chronic conditions or risk factors, and general health status (see supplement 1b)

Table S3. Leave-One-Study Out Sensitivity Analyses – Comparing Quartile 4 (most steps) vs 1 (ref: least steps)

| <b>Study Left Out</b> | <b>HR</b> | <b>95 %CI</b> |        |
|-----------------------|-----------|---------------|--------|
| ARIC                  | 0.5923    | 0.4118        | 0.852  |
| BRHS                  | 0.5988    | 0.4126        | 0.8692 |
| FHS                   | 0.5319    | 0.3638        | 0.7777 |
| CARDIA                | 0.5509    | 0.3795        | 0.7997 |
| JHS                   | 0.5813    | 0.4013        | 0.8421 |
| LIFE                  | 0.5796    | 0.3957        | 0.8491 |
| NAVIGATOR             | 0.5188    | 0.3401        | 0.7915 |
| HAI                   | 0.5922    | 0.4062        | 0.8633 |

Hazard Ratio and 95% Confidence Intervals [HR (95% CI)] adjusted for age, device wear time, race/Ethnicity (if applicable), sex (if applicable), education or occupation, BMI, and study-specific variables for lifestyle, chronic conditions or risk factors, and general health status (see supplement table 1b).

Table S4. Fixed vs Random Effects Models

Primary Results Fixed vs. Random Effects

|                                | HR   | 95% CI       |
|--------------------------------|------|--------------|
| Quartile 2 vs Quartile 1 (ref) |      |              |
| Fixed                          | 0.81 | (0.70; 0.92) |
| Random                         | 0.81 | (0.70; 0.92) |
| Quartile 3 vs Quartile 1 (ref) |      |              |
| Fixed                          | 0.66 | (0.57; 0.77) |
| Random                         | 0.66 | (0.57; 0.77) |
| Quartile 4 vs Quartile 1 (ref) |      |              |
| Fixed                          | 0.63 | (0.53; 0.73) |
| Random                         | 0.57 | (0.45; 0.74) |

Hazard Ratio and 95% Confidence Intervals [HR (95% CI)] adjusted for age, device wear time, race/Ethnicity (if applicable), sex (if applicable), education or occupation, BMI, and study-specific variables for lifestyle, chronic conditions or risk factors, and general health status (see supplement table 1b).

Table S5: Association of Stepping Rate Variables with CVD with and without Adjusting for Step Volume

|                                                                 | Step/d<br>Quartile | No. of<br>Studies | No. of Participants | CVD Events | HR (95% CI)       |
|-----------------------------------------------------------------|--------------------|-------------------|---------------------|------------|-------------------|
| <b>Peak 30</b>                                                  |                    |                   |                     |            |                   |
| <b>Model 2: Full Adjusted Model (not including step volume)</b> |                    |                   |                     |            |                   |
|                                                                 | Q1                 | 4                 | 2024                | 160        | 1                 |
|                                                                 | Q2                 | 4                 | 2025                | 107        | 0.81 [0.62; 1.05] |
|                                                                 | Q3                 | 4                 | 2027                | 113        | 0.91 [0.66; 1.26] |
|                                                                 | Q4                 | 4                 | 2025                | 78         | 0.72 [0.46; 1.13] |
| <b>Model 3: Full Adjusted Model PLUS Step Volume</b>            |                    |                   |                     |            |                   |
|                                                                 | Q1                 | 4                 | 2024                | 135        | 1                 |
|                                                                 | Q2                 | 4                 | 2025                | 96         | 0.84 [0.54; 1.30] |
|                                                                 | Q3                 | 4                 | 2027                | 108        | 1.20 [0.91; 1.59] |
|                                                                 | Q4                 | 4                 | 2025                | 83         | 1.01 [0.73; 1.39] |
| <b>Peak 60</b>                                                  |                    |                   |                     |            |                   |
| <b>Model 2: Full Adjusted Model (not including step volume)</b> |                    |                   |                     |            |                   |
|                                                                 | Q1                 | 3                 | 1989                | 96         | 1                 |
|                                                                 | Q2                 | 3                 | 1690                | 52         | 0.75 [0.45; 1.23] |
|                                                                 | Q3                 | 3                 | 1691                | 61         | 0.94 [0.66; 1.34] |
|                                                                 | Q4                 | 3                 | 1690                | 47         | 0.82 [0.55; 1.21] |
| <b>Model 3: Full Adjusted Model PLUS Step Volume</b>            |                    |                   |                     |            |                   |
|                                                                 | Q1                 | 3                 | 1689                | 89         | 1                 |
|                                                                 | Q2                 | 3                 | 1690                | 47         | 0.62 [0.41; 0.93] |
|                                                                 | Q3                 | 3                 | 1691                | 40         | 1.02 [0.67; 1.54] |
|                                                                 | Q4                 | 3                 | 1690                | 44         | 1.00 [0.62; 1.60] |
| <b>Time (in min) spent at ≥40 spm</b>                           |                    |                   |                     |            |                   |
| <b>Model 2: Full Adjusted Model (not including step volume)</b> |                    |                   |                     |            |                   |
|                                                                 | Q1                 | 3                 | 1686                | 96         | 1                 |
|                                                                 | Q2                 | 3                 | 1693                | 59         | 0.86 [0.59; 1.25] |
|                                                                 | Q3                 | 3                 | 1690                | 47         | 0.69 [0.47; 1.01] |
|                                                                 | Q4                 | 3                 | 1691                | 54         | 0.82 [0.57; 1.20] |
| <b>Model 3: Full Adjusted Model PLUS Step Volume</b>            |                    |                   |                     |            |                   |
|                                                                 | Q1                 | 3                 | 1688                | 84         | 1                 |
|                                                                 | Q2                 | 3                 | 1690                | 44         | 1.01 [0.65; 1.55] |
|                                                                 | Q3                 | 3                 | 1692                | 43         | 1.06 [0.67; 1.68] |
|                                                                 | Q4                 | 3                 | 1690                | 50         | 1.24 [0.74; 2.07] |
| <b>Time (in min) spent at ≥100 spm</b>                          |                    |                   |                     |            |                   |
| <b>Model 2: Full Adjusted Model (not including step volume)</b> |                    |                   |                     |            |                   |
|                                                                 | Q1                 | 2                 | 1574                | 89         | 1                 |
|                                                                 | Q2                 | 2                 | 1582                | 41         | 0.65 [0.44; 0.95] |
|                                                                 | Q3                 | 2                 | 1572                | 54         | 1.10 [0.60; 2.00] |
|                                                                 | Q4                 | 2                 | 1580                | 38         | 0.76 [0.50; 1.15] |
| <b>Model 3: Full Adjusted Model PLUS Step Volume</b>            |                    |                   |                     |            |                   |
|                                                                 | Q1                 | 2                 | 1577                | 78         | 1                 |
|                                                                 | Q2                 | 2                 | 1576                | 36         | 0.77 [0.52; 1.13] |
|                                                                 | Q3                 | 2                 | 1576                | 43         | 1.11 [0.53; 2.30] |
|                                                                 | Q4                 | 2                 | 1579                | 29         | 0.98 [0.53; 1.80] |

Model 2 adjusted for age, device wear time, race/Ethnicity (if applicable), sex (if applicable), education or occupation, BMI, and study-specific variables for lifestyle, chronic conditions or risk factors, and general health status (see supplement 1b), Model 3 adds steps/d using the residual method.



# Figure S6a. Peak 30 Minute Intensity – Forest Plots Final Model Adjusting for Steps/Day

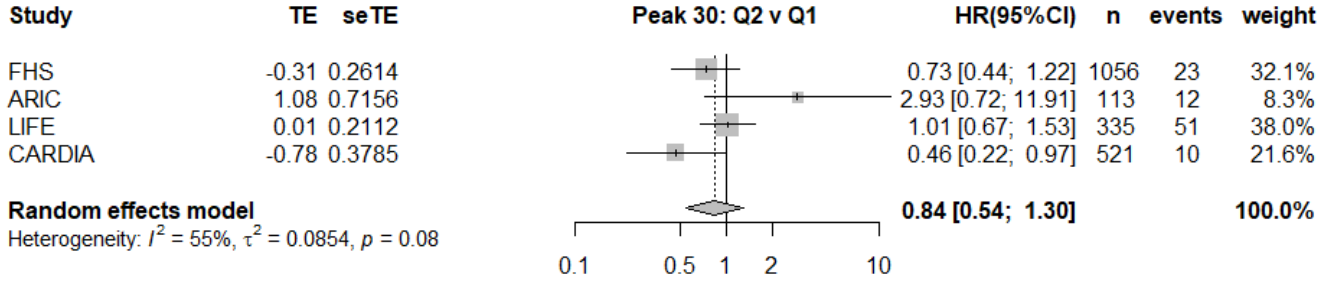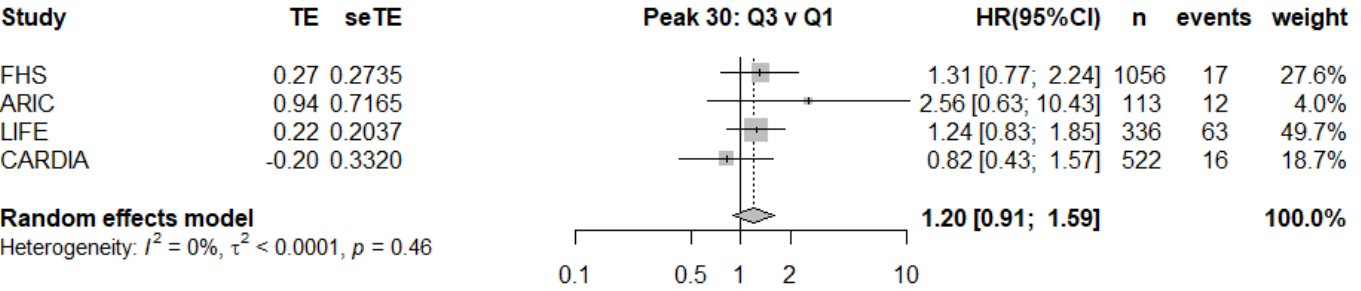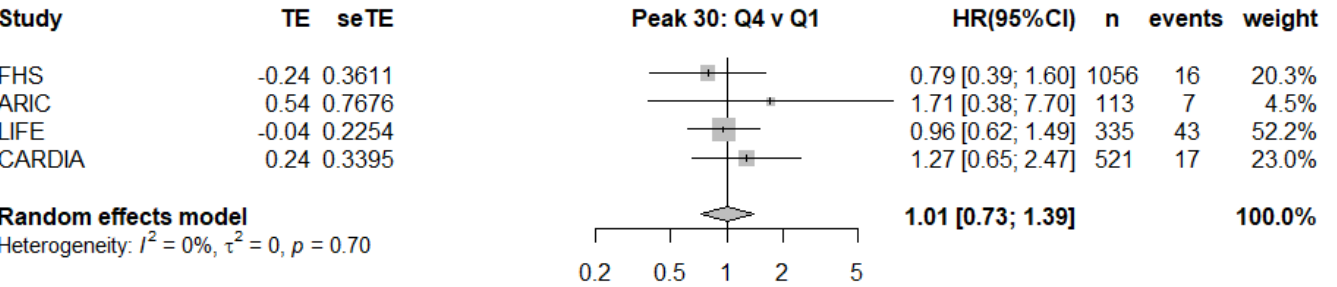

Peak 30 minute quantified as the highest steps/min observed in any 30 minutes, not necessarily consecutive, throughout a single day, and averaged across days.

TE = treatment Effect (log hazard ratio); sTE = standard error of treatment estimate; Q = Quartile; HR (95% CI) = Hazard Ratio and 95% Confidence Intervals. Models adjusted for age, device wear time, race/Ethnicity (if applicable), sex (if applicable), education or occupation, BMI, and study-specific variables for lifestyle, chronic conditions or risk factors, and general health status (see supplement 1b), plus steps/d using the residual method.

Figure 4b. Quartiles of Peak 30 Intensity by Study (Median Steps per Minute)

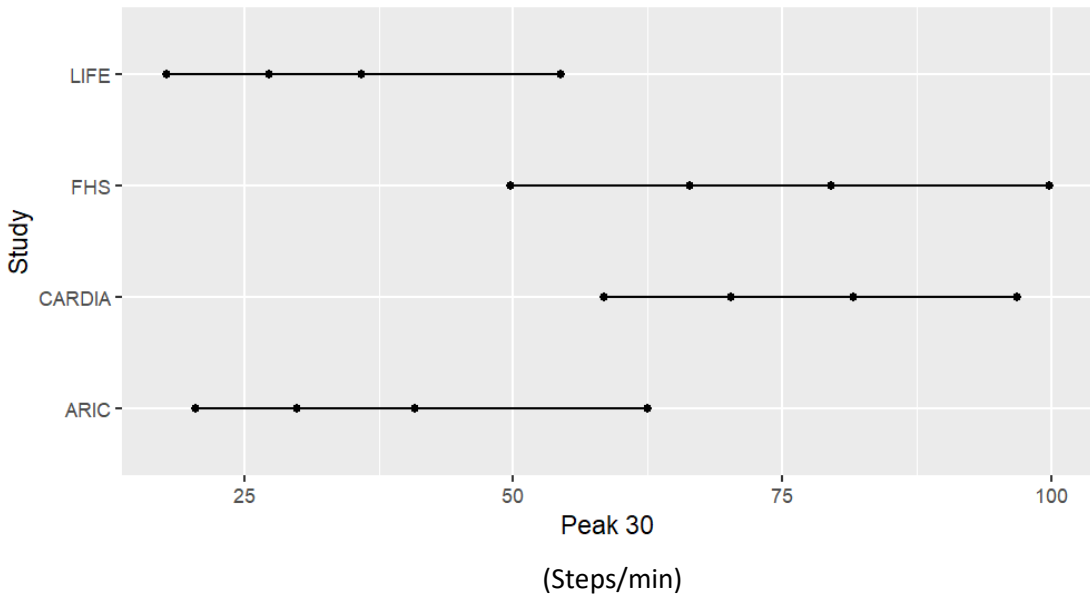

# Figure S6b. Peak 30 Minute Intensity – Forest Plots Final Model Adjusting for Steps/Day – Age Stratified

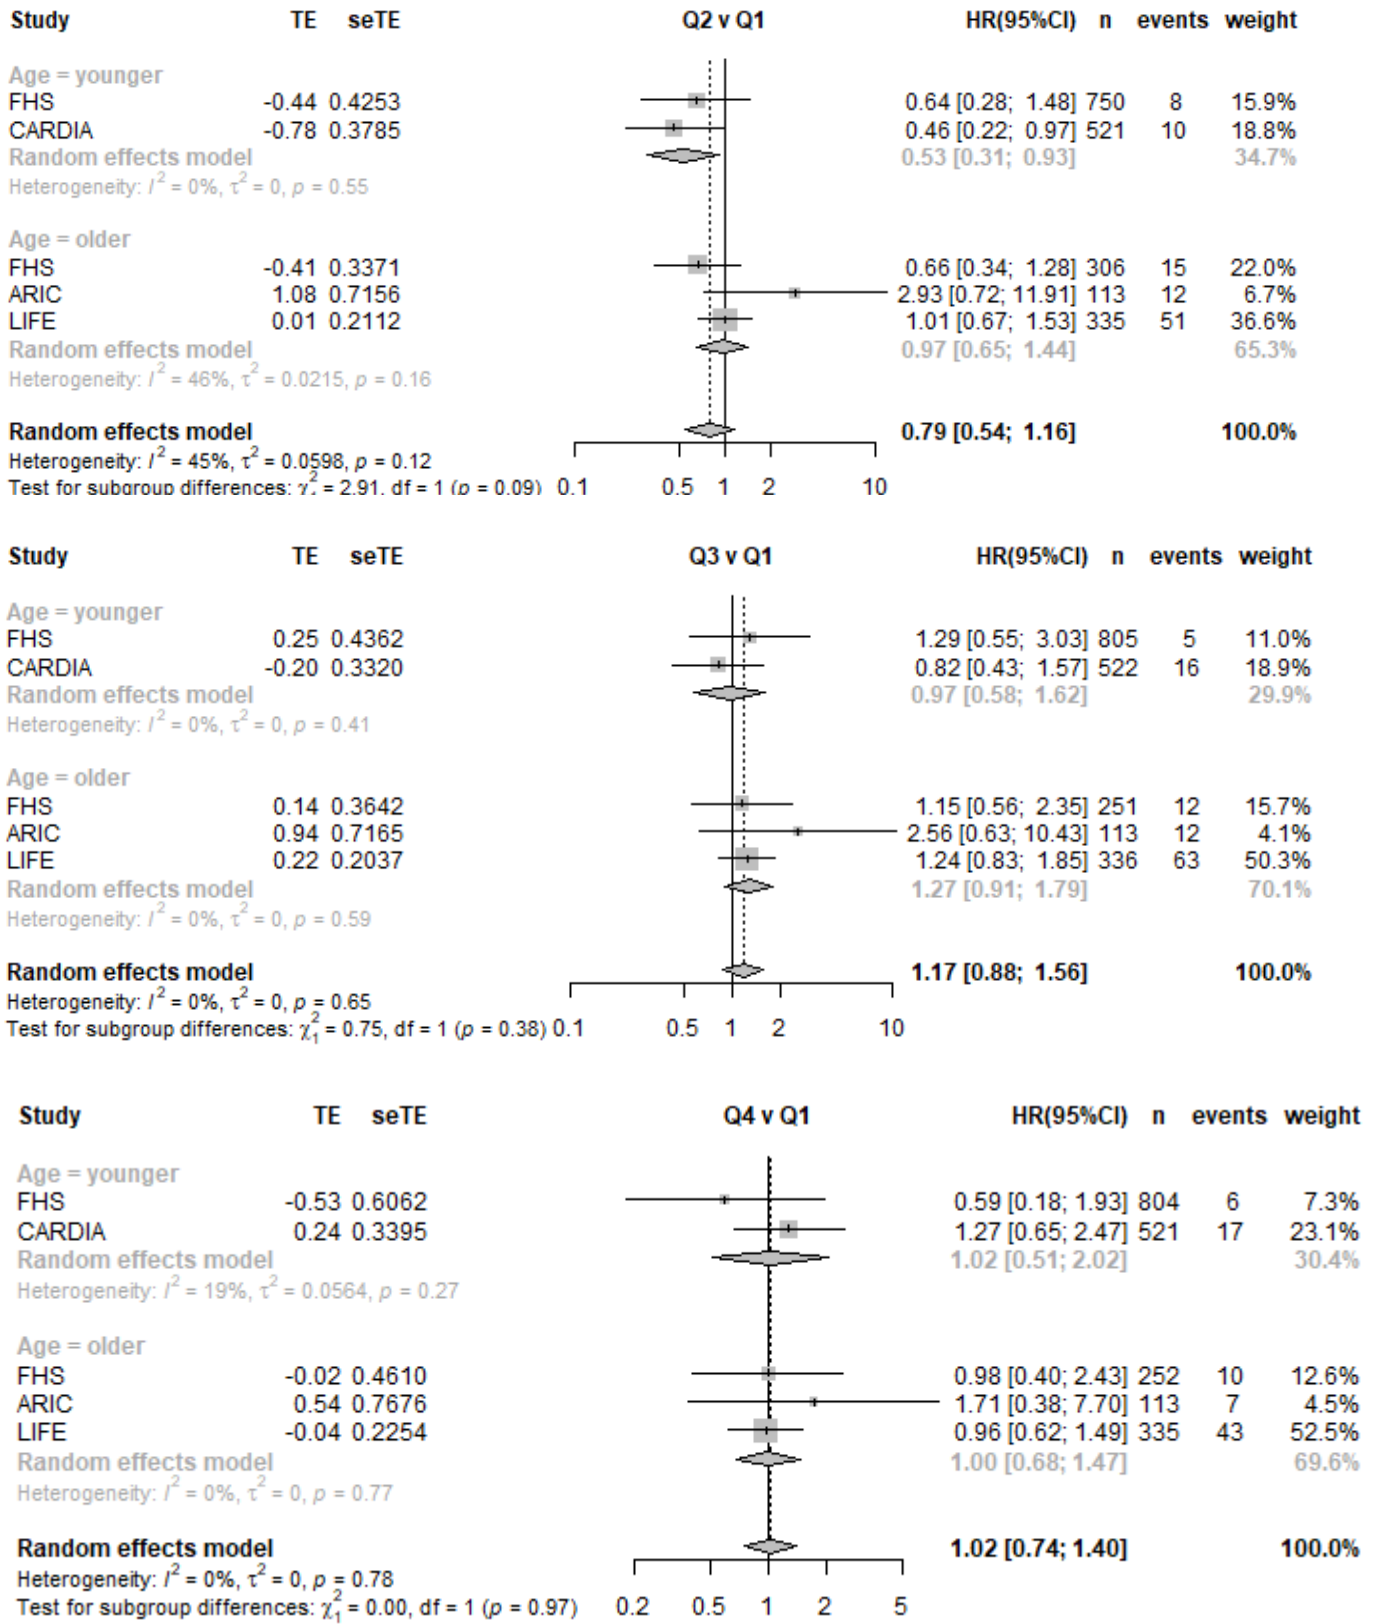

Peak 30 minute quantified as the highest steps/min observed in any 30 minutes, not necessarily consecutive, throughout a single day, and averaged across days.

TE = treatment Effect (log hazard ratio); sTE = standard error of treatment estimate; Q = Quartile; HR (95% CI) = Hazard Ratio and 95% Confidence Intervals. Models adjusted for age, device wear time, race/Ethnicity (if applicable), sex (if applicable), education or occupation, BMI, and study-specific variables for lifestyle, chronic conditions or risk factors, and general health status (see supplement 1b), plus steps/d using the residual method.

# Figure S7a. Peak 60 Minute Intensity – Forest Plots Final Model Adjusting for Steps/Day

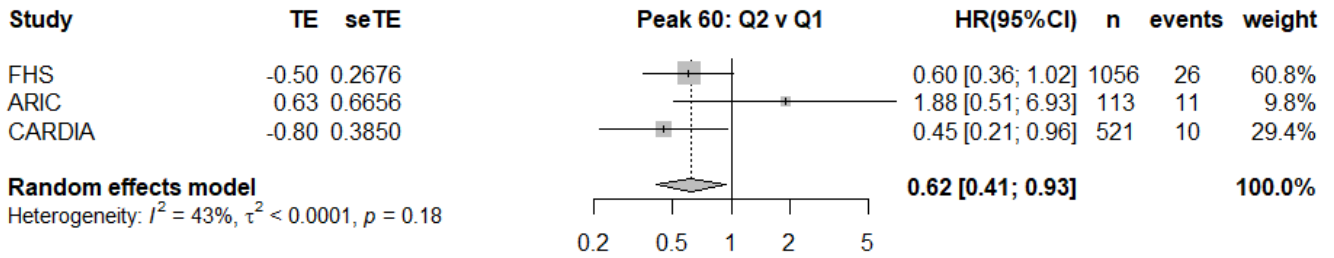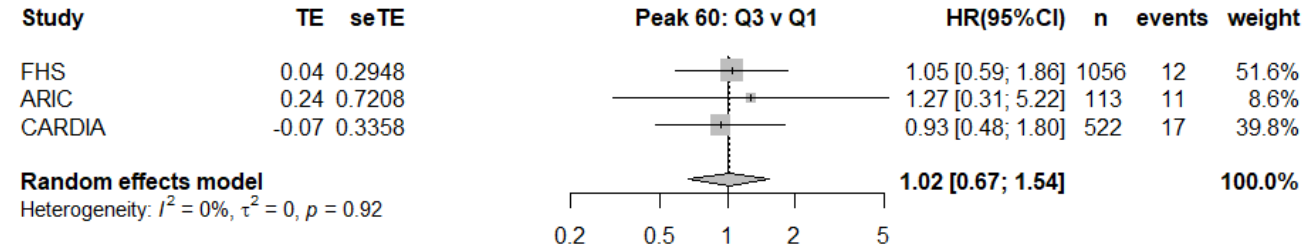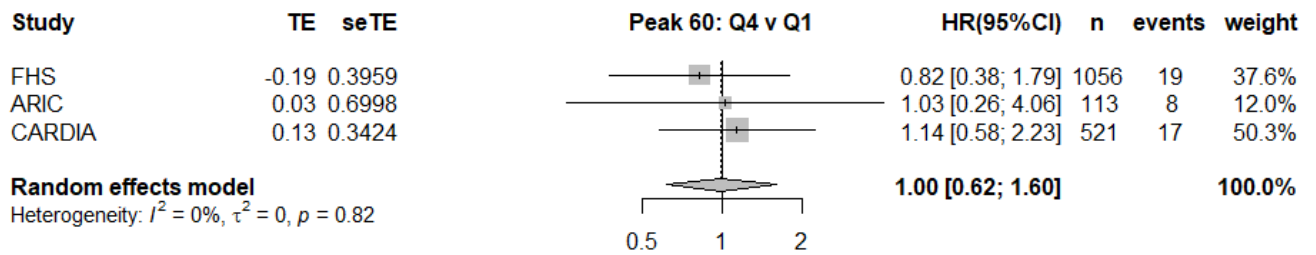

Peak 60 minute quantified as the highest steps/min observed in any 60 minutes, not necessarily consecutive, throughout a single day, and averaged across days.

TE = treatment Effect (log hazard ratio); sTE = standard error of treatment estimate; Q = Quartile; HR (95% CI) = Hazard Ratio and 95% Confidence Intervals. Models adjusted for age, device wear time, race/Ethnicity (if applicable), sex (if applicable), education or occupation, BMI, and study-specific variables for lifestyle, chronic conditions or risk factors, and general health status (see supplement 1b), plus steps/d using the residual method.

Figure 5b. Peak 60 Minute Intensity Medians by Quartile

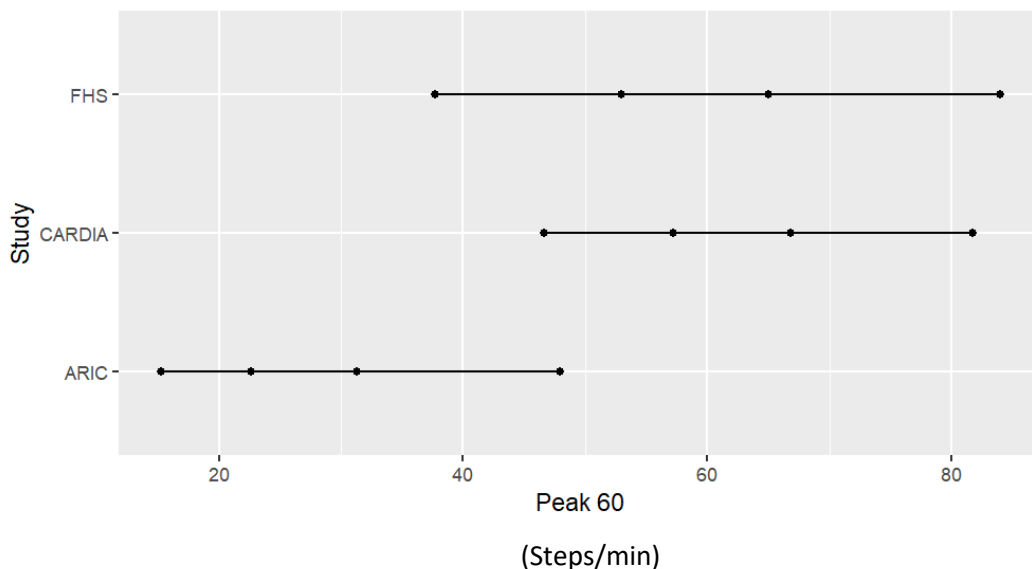

# Figure S7b. Peak 60 Minute Intensity – Forest Plots Final Model Adjusting for Steps/Day – Age Stratified

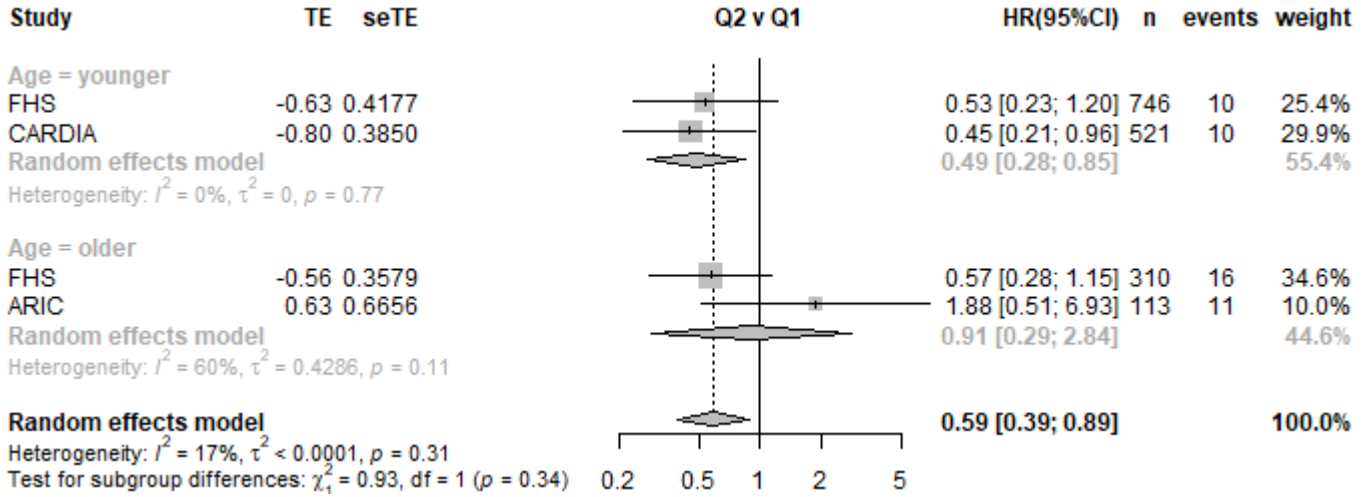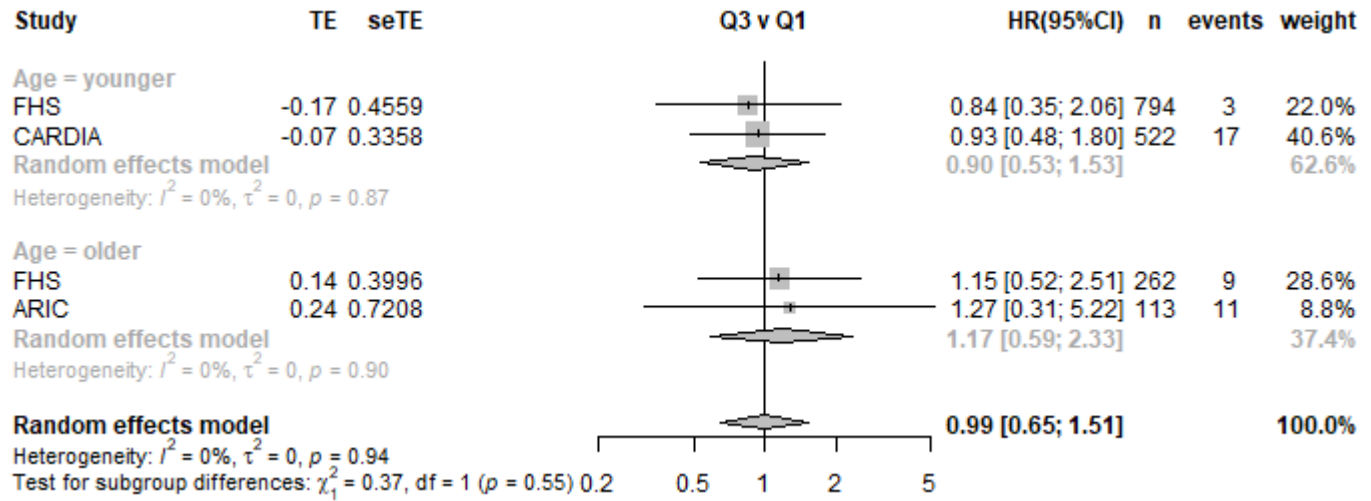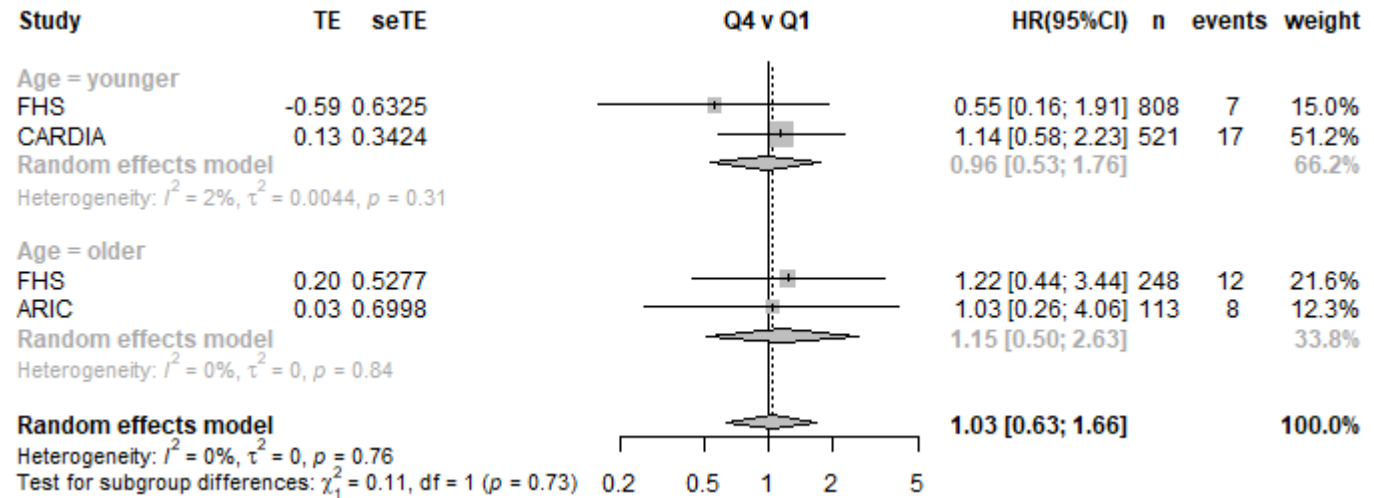

Peak 60 minute quantified as the highest steps/min observed in any 60 minutes, not necessarily consecutive, throughout a single day, and averaged across days.

TE = treatment Effect (log hazard ratio); sTE = standard error of treatment estimate; Q = Quartile; HR (95% CI) = Hazard Ratio and 95% Confidence Intervals. Models adjusted for age, device wear time, race/Ethnicity (if applicable), sex (if applicable), education or occupation, BMI, and study-specific variables for lifestyle, chronic conditions or risk factors, and general health status (see supplement 1b), plus steps/d using the residual method.

# Figure S8a. Time Spent at $\geq 40$ steps/min Intensity – Forest Plots Final Model Adjusting for Steps/Day

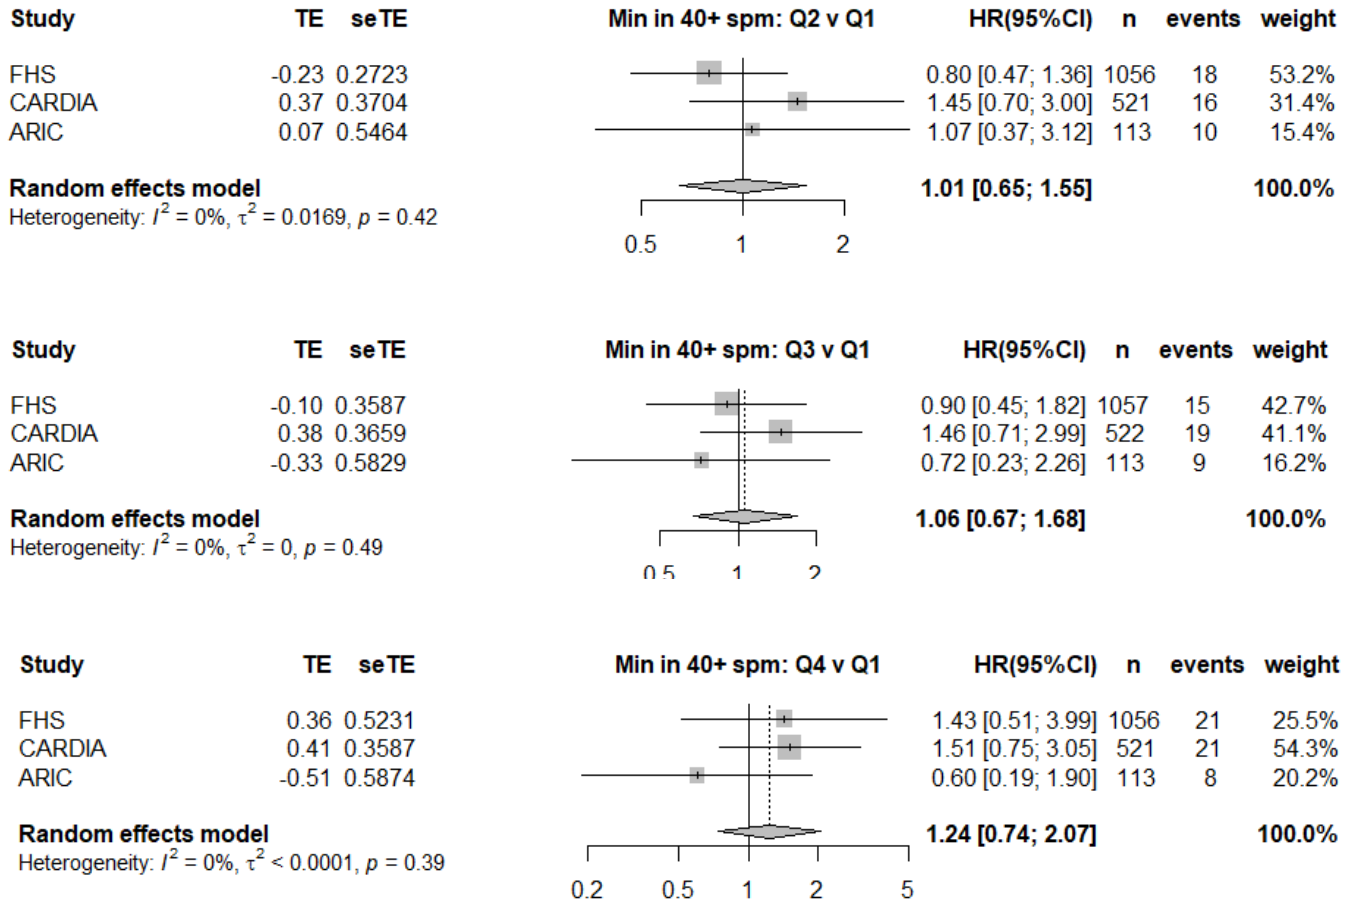

Time spent at  $\geq 40$  steps/min is quantified as the average duration (minutes per day) of steps accumulated at  $\geq 40$  steps/min, considered intentional walking

TE = treatment Effect (log hazard ratio); sTE = standard error of treatment estimate; Q = Quartile; HR (95% CI) = Hazard Ratio and 95% Confidence Intervals. Models adjusted for age, device wear time, race/Ethnicity (if applicable), sex (if applicable), education or occupation, BMI, and study-specific variables for lifestyle, chronic conditions or risk factors, and general health status (see supplement 1b), plus steps/d using the residual method.

## Figure 6b. Time Spent at $\geq 40$ steps/min Intensity Medians by Quartile

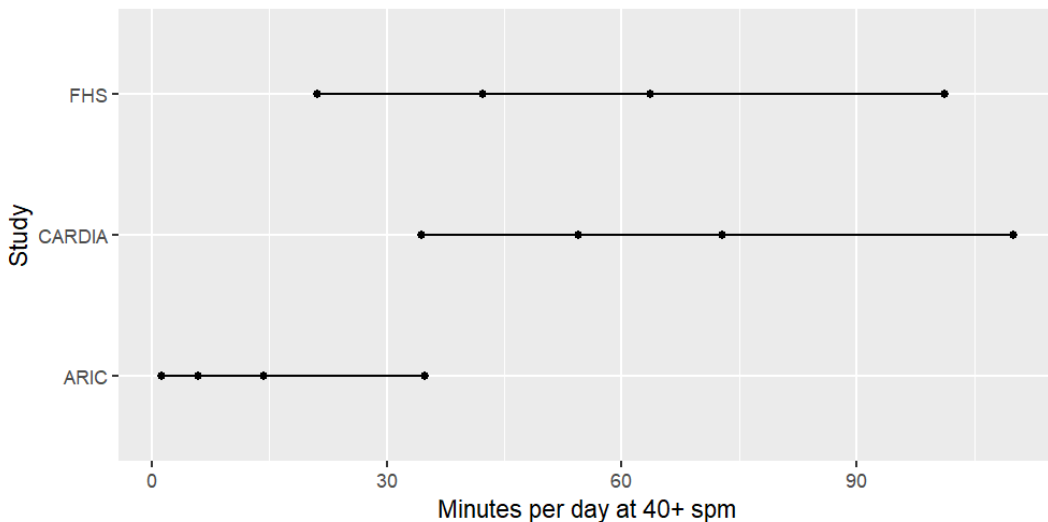

# Figure S8b. Time Spent at $\geq 40$ steps/min Intensity – Forest Plots Final Model Adjusting for Steps/Day – Age Stratified

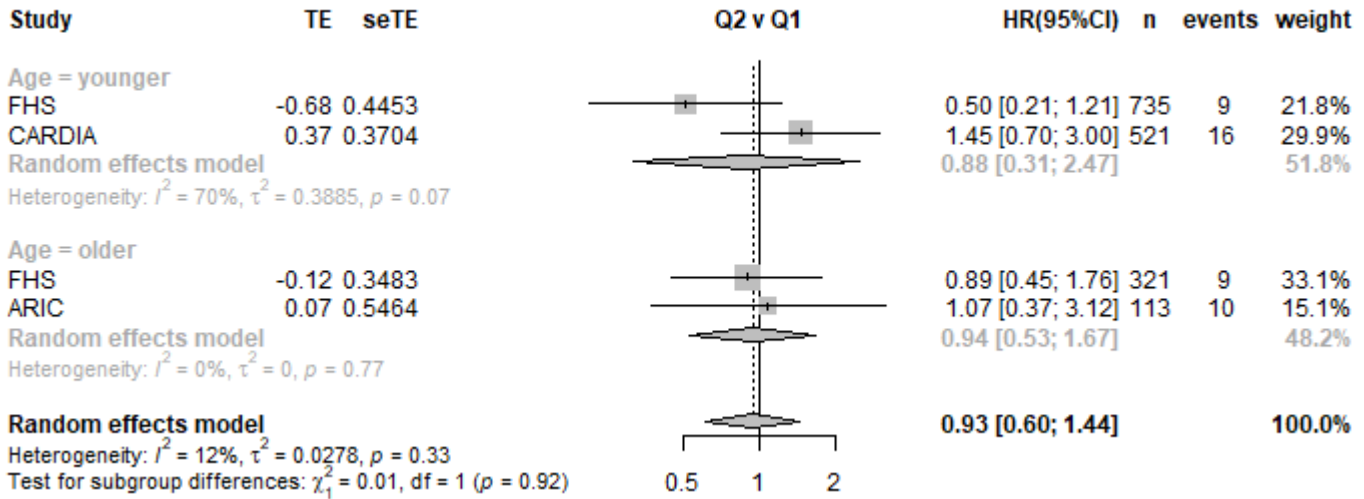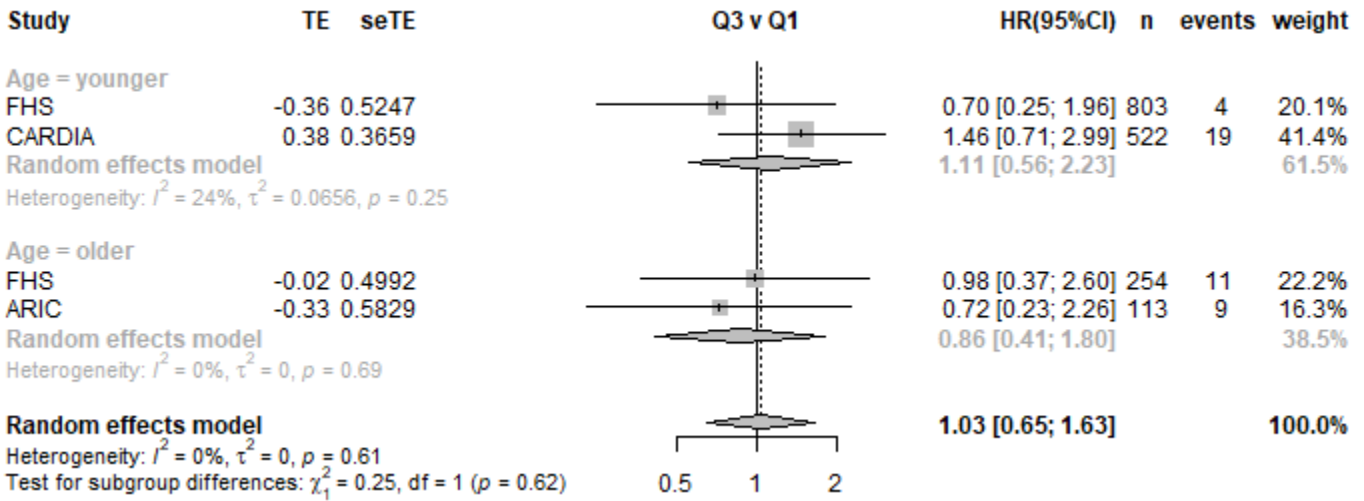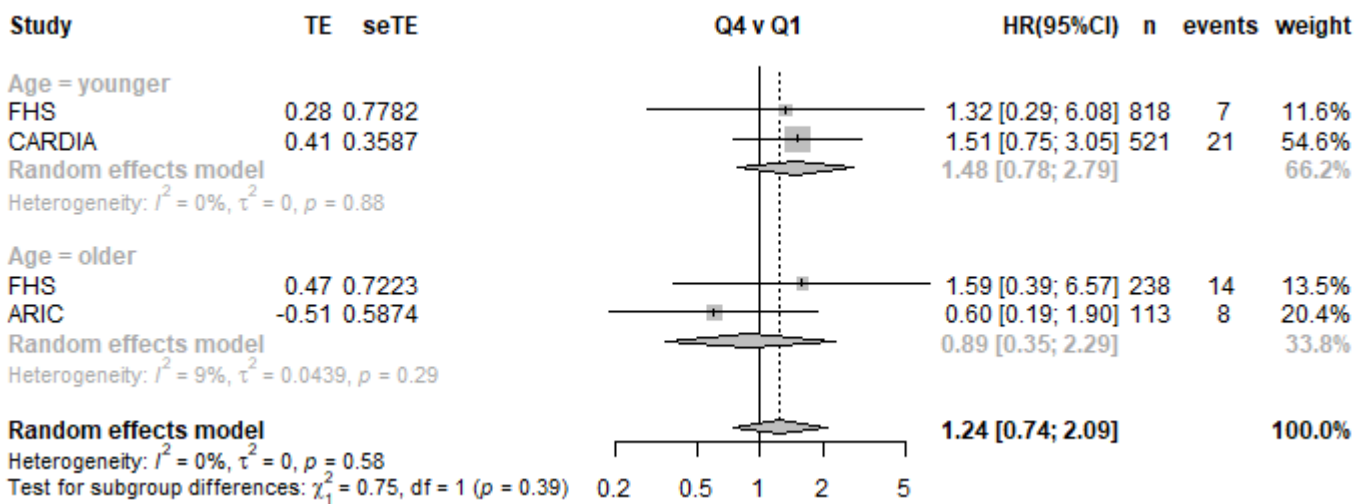

Time spent at  $\geq 40$  steps/min is quantified as the average duration (minutes per day) of steps accumulated at  $\geq 40$  steps/min, considered intentional walking

TE = treatment Effect (log hazard ratio); sTE = standard error of treatment estimate; Q = Quartile; HR (95% CI) = Hazard Ratio and 95% Confidence Intervals. Models adjusted for age, device wear time, race/Ethnicity (if applicable), sex (if applicable), education or occupation, BMI, and study-specific variables for lifestyle, chronic conditions or risk factors, and general health status (see supplement 1b), plus steps/d using the residual method.



# Figure S9a. Time Spent at $\geq 100$ steps/min Intensity – Forest Plots Final Model Adjusting for Steps/Day

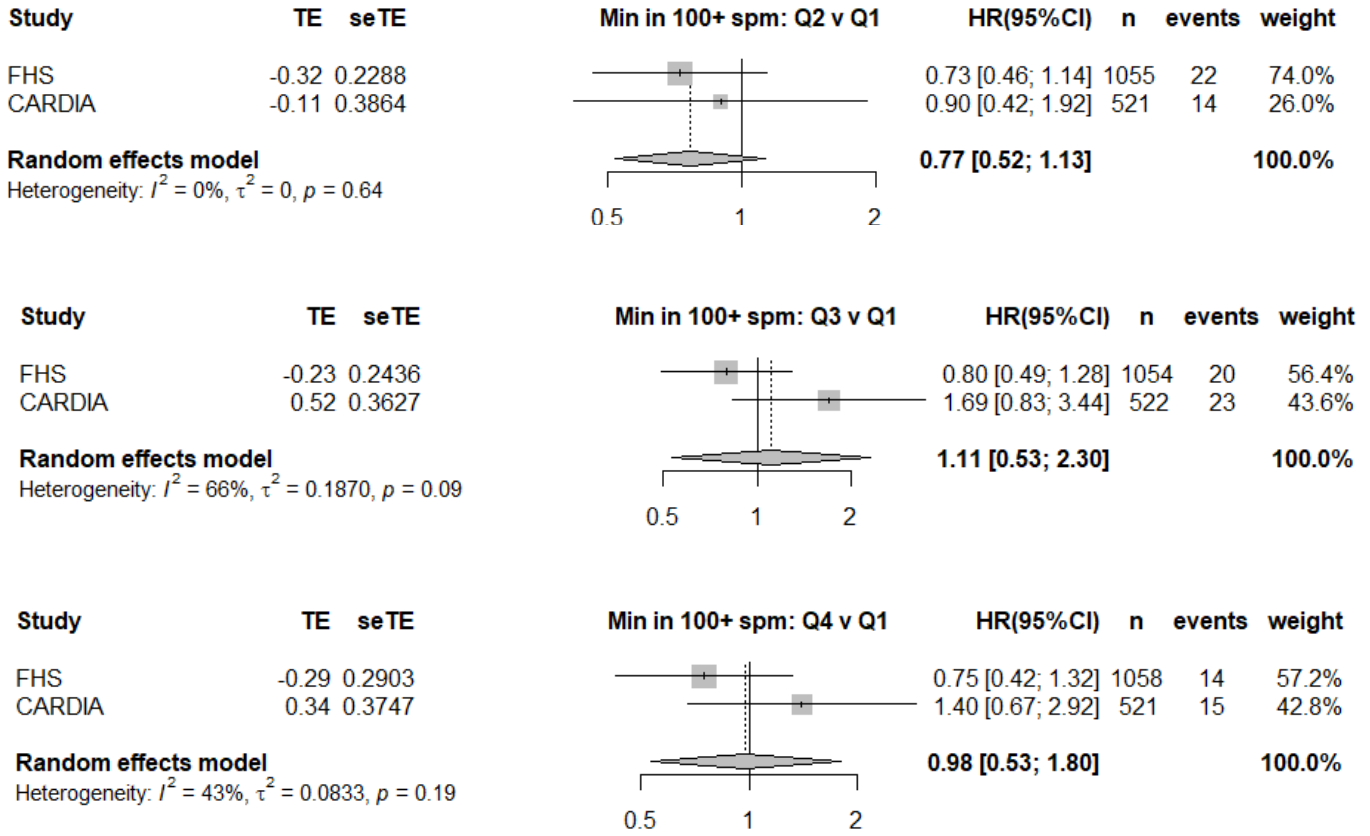

Time spent at  $\geq 100$  steps/min is quantified as the average duration (minutes per day) of steps accumulated at  $\geq 100$  steps/min, considered moderate intensity walking  
 TE = treatment Effect (log hazard ratio); sTE = standard error of treatment estimate; Q = Quartile; HR (95% CI) = Hazard Ratio and 95% Confidence Intervals. Models adjusted for age, device wear time, race/Ethnicity (if applicable), sex (if applicable), education or occupation, BMI, and study-specific variables for lifestyle, chronic conditions or risk factors, and general health status (see supplement 1b), plus steps/d using the residual method.

## Figure 7b. Time Spent at $\geq 100$ steps/min Intensity Medians by Quartile

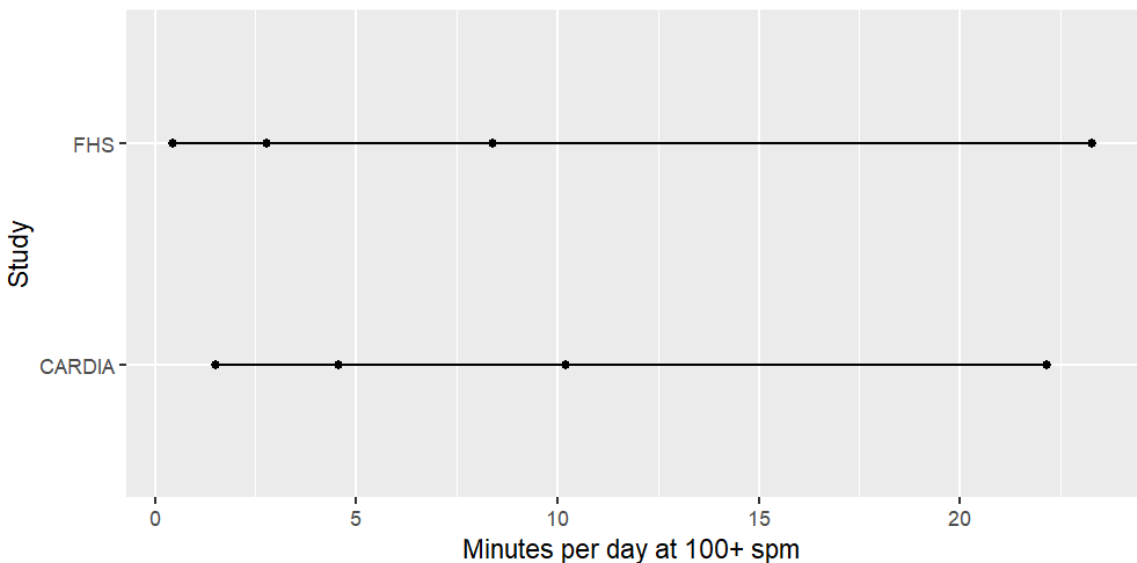

# Figure S9b. Time Spent at $\geq 100$ steps/min Intensity – Forest Plots Final Model Adjusting for Steps/Day – Stratified by Age

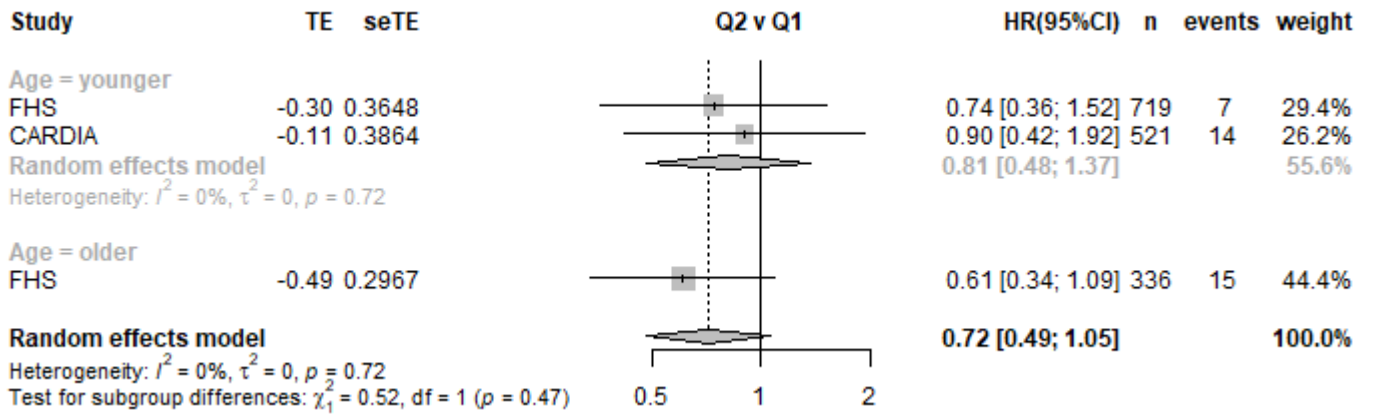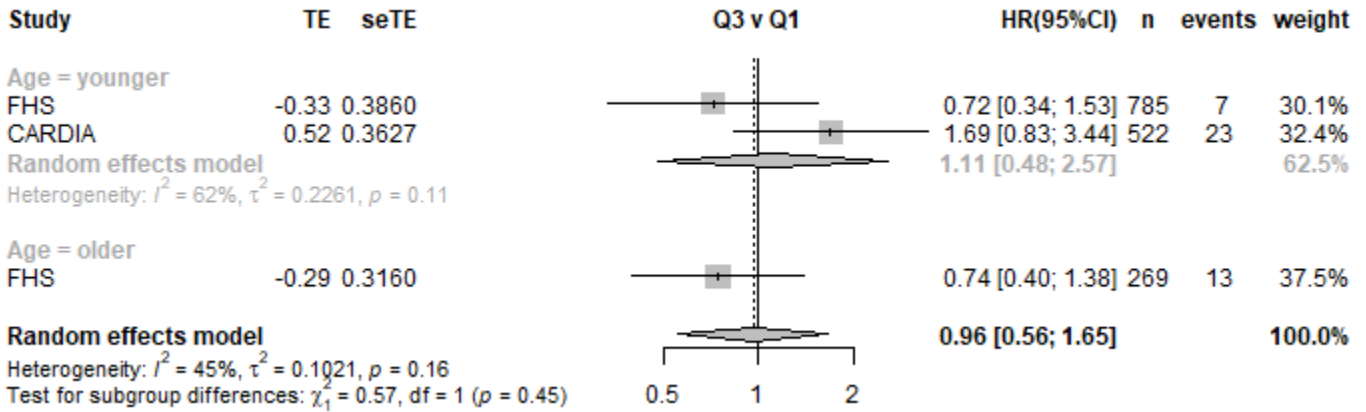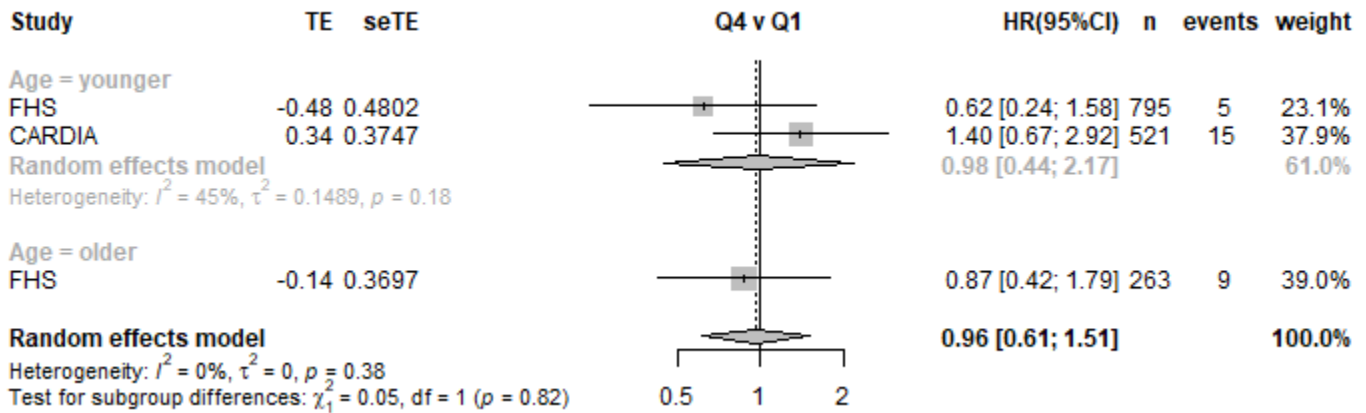

Time spent at  $\geq 100$  steps/min is quantified as the average duration (minutes per day) of steps accumulated at  $\geq 100$  steps/min, considered moderate intensity walking

TE = treatment Effect (log hazard ratio); sTE = standard error of treatment estimate; Q = Quartile; HR (95% CI) = Hazard Ratio and 95% Confidence Intervals. Models adjusted for age, device wear time, race/Ethnicity (if applicable), sex (if applicable), education or occupation, BMI, and study-specific variables for lifestyle, chronic conditions or risk factors, and general health status (see supplement 1b), plus steps/d using the residual method.
